# Supplementary material for: Comprehensive Analysis of Long Non-coding RNA Modulates Axillary Bud Development in Tobacco (Nicotiana tabacum L.)
Source: Front Plant Sci. 2022 Feb 14;13:809435. doi: 10.3389/fpls.2022.809435 (PMC8884251; doi:10.3389/fpls.2022.809435)
Supplement: Supplementary file 5 [file Table_1.XLSX]

## Sheet: qRT-PCR
Table S1. The primers sequences used in this study for qRT-PCR.
Gene name	Forward primer (5'-3')	Reverse primer (5'-3')
MSTRG.60026.1	TTGGCGTTTGAGTTCGTTGT	TCGGACCAGTAAGTTTCGGA
MSTRG.28416.1	AGGATTGGGTCTTGCTTGGA	CGGAAGCAAACAGTAGGCAG
MSTRG.33911.1	TGCACCCATGTATCAGGAGA	TCACATGGCTAGGAAGGACA
MSTRG.32988.1	GGCAACAACAGAAGAAGCAAG	CAGGCAATACAAGCGAGCAA
MSTRG.32043.1	CCACTATTGACGTGCCATGG	AGGGTTGGTTGCAATTGGAC
MSTRG.25624.1	AACGACCTTGAACAACCAGC	ACAAAACTCCACTGGTTCGC
MSTRG.52498.1	TGTTCGTCGAGGTCCCTTAC	GCAGCAAACCCAGATTCTTC
MSTRG.17770.1	TCCCAATTTTTGCCTATGTTC	CCCTGATTAAGCTCCTCGAA
lncRNA 28151.1	ATTTGGACTTGCTGCCTTGT	TCATCTCCTTCAACCCCAAC
Nitab4.5_0002104g0010.1	CAGTGGCATCGGTGTGTATG	ATAGACCTCATCACTCGCCG
Nitab4.5_0000359g0070.1	ATGAAGACGCTCCTGGACTC	AGCACATCCCATACCCCATC
Nitab4.5_0002155g0050.1	AACGAGGAAACAAGCCATGG	ACCCCAACTTGACCTCTAGC
Nitab4.5_0001992g0100.1	TATCGTTCTCACCGGCTGTT	GGATCTACGAGGTGGGGAAG
Nitab4.5_0000208g0150.1	GGGTTTTGGACCAAGCTGTA	CAACAACGGAGGTGGATACC
NtTB1	CGCGATTTGCCTTTATGACT	TTGCGGGACAGTGATGATTA

## Sheet: amplification
	Table S1. The primers sequences used in this study for amplification.
	Gene name	Forward primer (5'-3')	Reverse primer (5'-3')
	NtCCD8	GGATCCATGGCTTCTTTTGCTTCTTC	GAGCTCCTATTTCTTTGCAACCCAGC
Primers for reverse fragment amplification primer	r NtTB1	AGCCTGCAGCCATGGCCATCATCAAAGAAGAGAAAACTAA	ATAGACTTACAACGTATGATCTTCACATTCCAA
Primers for forward fragment amplification	f NtTB1	GCGGGTCGACGGTACCCCATCATCAAAGAAGAGAAAACTAA	GACCCAGCAGATAGAATGATCTTCACATTCCAA
Primers for reverse fragment amplification primer	r MSTRG.28151.1	AGCCTGCAGCCATGGATCAACAGCTTCTCGCTT	ATAGACTTACAACGTATCTGAAATCATATGCTCA
Primers for forward fragment amplification	f MSTRG.28151.1	GCGGGTCGACGGTAATCAACAGCTTCTCGCTT	GACCCAGCAGATAGAATCTGAAATCATATGCTCA
