# Supplementary material for: Comprehensive Analysis of Long Non-coding RNA Modulates Axillary Bud Development in Tobacco (Nicotiana tabacum L.)
Source: Front Plant Sci. 2022 Feb 14;13:809435. doi: 10.3389/fpls.2022.809435 (PMC8884251; doi:10.3389/fpls.2022.809435)
Supplement: Supplementary file 6 [file Table_2.XLSX]

## Sheet: Sheet1
Table S2. The statistics table of effective data
Sample Name	Clean reads	total mapped reads rate	unique mapped reads rate	Q30 rate
Ckd1	54310123	96.67	77.86	90.51
Ckd2	60809702	96.63	72.59	89.32
Ckd3	63258685	96.9	79.74	90.74
Cku1	62798417	97.22	79.25	93.1
Cku2	63324942	97.42	78.07	91.16
Cku3	60904782	97.26	78.4	90.74
Dd1	58269218	93.06	74.52	90.74
Dd2A	61097153	96.94	77.52	91.17
Dd3A	60243613	96.98	77.02	90.35
Du1A	61322782	96.78	76.63	90.45
Du2A	62026701	96.45	78.13	90.74
Du3A	58652358	97.39	79.9	90.9
Fu1A	62058232	97.36	79.8	91
Fu2A	63288479	95.6	75.7	91.55
Fu3A	62601604	96.87	77.65	90.36
Gu1A	61764465	97.05	80.01	90.91
Gu2A	62406949	97.22	75.69	91.99
Gu3A	54514824	96.88	76.34	90.9
