# Supplementary material for: Comprehensive Analysis of Long Non-coding RNA Modulates Axillary Bud Development in Tobacco (Nicotiana tabacum L.)
Source: Front Plant Sci. 2022 Feb 14;13:809435. doi: 10.3389/fpls.2022.809435 (PMC8884251; doi:10.3389/fpls.2022.809435)
Supplement: Supplementary file 7 [file Table_3.XLSX]

## Sheet: Sheet1
Table S3. The predicted lncRNAs and mRNAs in the axillary bud of tobacco.
Sample	mRNAs
MSTRG.1000.1	Nitab4.5_0000001g0010.1
MSTRG.10015.1	Nitab4.5_0000001g0020.1
MSTRG.1003.1	Nitab4.5_0000001g0030.1
MSTRG.10042.1	Nitab4.5_0000001g0040.1
MSTRG.10052.1	Nitab4.5_0000001g0050.1
MSTRG.10055.1	Nitab4.5_0000001g0060.1
MSTRG.10057.1	Nitab4.5_0000001g0070.1
MSTRG.10066.1	Nitab4.5_0000001g0080.1
MSTRG.10080.1	Nitab4.5_0000001g0090.1
MSTRG.10081.3	Nitab4.5_0000001g0100.1
MSTRG.10081.4	Nitab4.5_0000001g0110.1
MSTRG.10083.1	Nitab4.5_0000001g0120.1
MSTRG.10084.1	Nitab4.5_0000001g0130.1
MSTRG.10091.1	Nitab4.5_0000001g0140.1
MSTRG.10127.1	Nitab4.5_0000001g0150.1
MSTRG.10151.1	Nitab4.5_0000001g0160.1
MSTRG.10185.1	Nitab4.5_0000001g0170.1
MSTRG.10200.1	Nitab4.5_0000001g0180.1
MSTRG.10209.1	Nitab4.5_0000001g0190.1
MSTRG.10212.1	Nitab4.5_0000001g0200.1
MSTRG.10215.1	Nitab4.5_0000001g0210.1
MSTRG.10222.1	Nitab4.5_0000001g0220.1
MSTRG.10247.1	Nitab4.5_0000001g0230.1
MSTRG.10248.1	Nitab4.5_0000001g0240.1
MSTRG.10250.1	Nitab4.5_0000001g0250.1
MSTRG.10271.1	Nitab4.5_0000001g0260.1
MSTRG.10279.1	Nitab4.5_0000001g0270.1
MSTRG.10293.1	Nitab4.5_0000001g0280.1
MSTRG.10313.1	Nitab4.5_0000001g0290.1
MSTRG.10329.1	Nitab4.5_0000001g0300.1
MSTRG.10329.2	Nitab4.5_0000001g0310.1
MSTRG.10332.1	Nitab4.5_0000001g0320.1
MSTRG.10338.1	Nitab4.5_0000001g0330.1
MSTRG.10338.2	Nitab4.5_0000001g0340.1
MSTRG.10346.1	Nitab4.5_0000001g0350.1
MSTRG.10348.1	Nitab4.5_0000001g0360.1
MSTRG.10349.1	Nitab4.5_0000001g0370.1
MSTRG.10351.1	Nitab4.5_0000001g0380.1
MSTRG.10355.1	Nitab4.5_0000001g0390.1
MSTRG.10358.1	Nitab4.5_0000001g0400.1
MSTRG.1037.1	Nitab4.5_0000001g0410.1
MSTRG.10377.1	Nitab4.5_0000001g0420.1
MSTRG.10378.1	Nitab4.5_0000001g0430.1
MSTRG.10379.1	Nitab4.5_0000001g0440.1
MSTRG.10389.1	Nitab4.5_0000001g0450.1
MSTRG.10390.1	Nitab4.5_0000001g0460.1
MSTRG.10392.1	Nitab4.5_0000001g0470.1
MSTRG.10406.1	Nitab4.5_0000001g0480.1
MSTRG.10406.2	Nitab4.5_0000001g0490.1
MSTRG.10435.1	Nitab4.5_0000001g0500.1
MSTRG.10440.1	Nitab4.5_0000001g0510.1
MSTRG.10444.1	Nitab4.5_0000002g0010.1
MSTRG.10444.2	Nitab4.5_0000002g0020.1
MSTRG.10444.3	Nitab4.5_0000002g0030.1
MSTRG.10455.1	Nitab4.5_0000002g0040.1
MSTRG.10468.1	Nitab4.5_0000002g0050.1
MSTRG.1047.1	Nitab4.5_0000002g0060.1
MSTRG.10482.1	Nitab4.5_0000002g0070.1
MSTRG.10483.1	Nitab4.5_0000002g0080.1
MSTRG.10484.1	Nitab4.5_0000002g0090.1
MSTRG.10484.2	Nitab4.5_0000002g0100.1
MSTRG.105.1	Nitab4.5_0000002g0110.1
MSTRG.105.2	Nitab4.5_0000002g0120.1
MSTRG.10501.1	Nitab4.5_0000002g0130.1
MSTRG.1052.1	Nitab4.5_0000002g0140.1
MSTRG.10522.1	Nitab4.5_0000002g0150.1
MSTRG.10523.1	Nitab4.5_0000002g0160.1
MSTRG.10526.1	Nitab4.5_0000002g0170.1
MSTRG.10528.1	Nitab4.5_0000002g0180.1
MSTRG.10537.1	Nitab4.5_0000002g0190.1
MSTRG.10538.1	Nitab4.5_0000002g0200.1
MSTRG.10549.1	Nitab4.5_0000002g0210.1
MSTRG.10549.2	Nitab4.5_0000002g0220.1
MSTRG.10584.1	Nitab4.5_0000002g0230.1
MSTRG.1059.1	Nitab4.5_0000002g0240.1
MSTRG.1059.2	Nitab4.5_0000002g0250.1
MSTRG.1059.3	Nitab4.5_0000002g0260.1
MSTRG.10597.1	Nitab4.5_0000002g0270.1
MSTRG.10599.1	Nitab4.5_0000002g0280.1
MSTRG.1060.1	Nitab4.5_0000002g0290.1
MSTRG.10604.1	Nitab4.5_0000002g0300.1
MSTRG.10605.2	Nitab4.5_0000002g0310.1
MSTRG.10627.1	Nitab4.5_0000002g0320.1
MSTRG.10628.1	Nitab4.5_0000002g0330.1
MSTRG.10631.1	Nitab4.5_0000002g0340.1
MSTRG.10632.1	Nitab4.5_0000002g0350.1
MSTRG.10641.1	Nitab4.5_0000002g0360.1
MSTRG.10641.2	Nitab4.5_0000002g0370.1
MSTRG.10663.1	Nitab4.5_0000002g0380.1
MSTRG.1067.1	Nitab4.5_0000002g0390.1
MSTRG.10673.1	Nitab4.5_0000002g0400.1
MSTRG.10679.1	Nitab4.5_0000002g0410.1
MSTRG.1068.1	Nitab4.5_0000002g0420.1
MSTRG.1069.1	Nitab4.5_0000002g0430.1
MSTRG.10699.1	Nitab4.5_0000002g0440.1
MSTRG.10750.1	Nitab4.5_0000002g0450.1
MSTRG.10750.2	Nitab4.5_0000002g0460.1
MSTRG.10750.3	Nitab4.5_0000002g0470.1
MSTRG.10756.1	Nitab4.5_0000002g0480.1
MSTRG.10766.1	Nitab4.5_0000002g0490.1
MSTRG.10780.1	Nitab4.5_0000002g0500.1
MSTRG.10801.1	Nitab4.5_0000002g0510.1
MSTRG.1081.1	Nitab4.5_0000002g0520.1
MSTRG.10815.1	Nitab4.5_0000002g0530.1
MSTRG.10815.2	Nitab4.5_0000002g0540.1
MSTRG.10816.1	Nitab4.5_0000002g0550.1
MSTRG.10817.1	Nitab4.5_0000002g0560.1
MSTRG.10818.1	Nitab4.5_0000002g0570.1
MSTRG.10819.1	Nitab4.5_0000002g0580.1
MSTRG.10825.1	Nitab4.5_0000002g0590.1
MSTRG.10826.1	Nitab4.5_0000003g0010.1
MSTRG.1083.1	Nitab4.5_0000003g0020.1
MSTRG.10830.1	Nitab4.5_0000003g0030.1
MSTRG.10889.1	Nitab4.5_0000003g0040.1
MSTRG.10898.1	Nitab4.5_0000003g0050.1
MSTRG.10908.1	Nitab4.5_0000003g0060.1
MSTRG.10916.1	Nitab4.5_0000003g0070.1
MSTRG.10917.1	Nitab4.5_0000003g0080.1
MSTRG.10922.1	Nitab4.5_0000003g0090.1
MSTRG.10923.1	Nitab4.5_0000003g0100.1
MSTRG.10923.2	Nitab4.5_0000003g0110.1
MSTRG.10923.3	Nitab4.5_0000003g0120.1
MSTRG.10923.4	Nitab4.5_0000003g0130.1
MSTRG.10926.1	Nitab4.5_0000003g0140.1
MSTRG.10926.2	Nitab4.5_0000003g0150.1
MSTRG.10926.3	Nitab4.5_0000003g0160.1
MSTRG.10930.3	Nitab4.5_0000003g0170.1
MSTRG.10935.1	Nitab4.5_0000003g0180.1
MSTRG.10951.1	Nitab4.5_0000003g0190.1
MSTRG.10951.2	Nitab4.5_0000003g0200.1
MSTRG.10951.3	Nitab4.5_0000003g0210.1
MSTRG.10957.1	Nitab4.5_0000003g0220.1
MSTRG.10997.1	Nitab4.5_0000003g0230.1
MSTRG.10998.3	Nitab4.5_0000003g0240.1
MSTRG.11003.1	Nitab4.5_0000003g0250.1
MSTRG.11011.1	Nitab4.5_0000003g0260.1
MSTRG.11020.1	Nitab4.5_0000003g0270.1
MSTRG.11034.1	Nitab4.5_0000003g0280.1
MSTRG.11037.1	Nitab4.5_0000003g0290.1
MSTRG.1104.1	Nitab4.5_0000003g0300.1
MSTRG.11066.1	Nitab4.5_0000003g0310.1
MSTRG.11102.1	Nitab4.5_0000003g0320.1
MSTRG.11104.1	Nitab4.5_0000003g0330.1
MSTRG.11113.1	Nitab4.5_0000003g0340.1
MSTRG.1112.1	Nitab4.5_0000003g0350.1
MSTRG.11131.1	Nitab4.5_0000003g0360.1
MSTRG.11143.2	Nitab4.5_0000003g0370.1
MSTRG.11156.5	Nitab4.5_0000003g0380.1
MSTRG.11160.1	Nitab4.5_0000003g0390.1
MSTRG.11161.1	Nitab4.5_0000003g0400.1
MSTRG.11164.1	Nitab4.5_0000003g0410.1
MSTRG.11173.1	Nitab4.5_0000003g0420.1
MSTRG.11176.1	Nitab4.5_0000003g0430.1
MSTRG.11180.1	Nitab4.5_0000003g0440.1
MSTRG.11181.1	Nitab4.5_0000003g0450.1
MSTRG.11181.2	Nitab4.5_0000003g0460.1
MSTRG.11185.1	Nitab4.5_0000003g0470.1
MSTRG.11185.2	Nitab4.5_0000003g0480.1
MSTRG.11189.1	Nitab4.5_0000003g0490.1
MSTRG.11191.2	Nitab4.5_0000003g0500.1
MSTRG.11191.5	Nitab4.5_0000003g0510.1
MSTRG.11192.1	Nitab4.5_0000003g0520.1
MSTRG.11193.1	Nitab4.5_0000003g0530.1
MSTRG.11204.2	Nitab4.5_0000003g0540.1
MSTRG.11205.1	Nitab4.5_0000003g0550.1
MSTRG.11231.1	Nitab4.5_0000003g0560.1
MSTRG.11232.1	Nitab4.5_0000003g0570.1
MSTRG.11232.2	Nitab4.5_0000003g0580.1
MSTRG.11233.1	Nitab4.5_0000003g0590.1
MSTRG.11233.2	Nitab4.5_0000003g0600.1
MSTRG.11233.3	Nitab4.5_0000003g0610.1
MSTRG.11233.4	Nitab4.5_0000003g0620.1
MSTRG.11244.1	Nitab4.5_0000003g0630.1
MSTRG.11247.1	Nitab4.5_0000003g0640.1
MSTRG.11254.1	Nitab4.5_0000003g0650.1
MSTRG.11268.2	Nitab4.5_0000003g0660.1
MSTRG.11273.1	Nitab4.5_0000003g0670.1
MSTRG.11277.1	Nitab4.5_0000003g0680.1
MSTRG.11278.1	Nitab4.5_0000003g0690.1
MSTRG.11283.1	Nitab4.5_0000003g0700.1
MSTRG.11284.1	Nitab4.5_0000003g0710.1
MSTRG.11307.1	Nitab4.5_0000003g0720.1
MSTRG.11313.1	Nitab4.5_0000003g0730.1
MSTRG.11362.1	Nitab4.5_0000003g0740.1
MSTRG.1137.1	Nitab4.5_0000003g0750.1
MSTRG.11377.1	Nitab4.5_0000003g0760.1
MSTRG.11378.1	Nitab4.5_0000003g0770.1
MSTRG.11400.3	Nitab4.5_0000003g0780.1
MSTRG.11401.1	Nitab4.5_0000003g0790.1
MSTRG.11401.2	Nitab4.5_0000003g0800.1
MSTRG.11401.3	Nitab4.5_0000003g0810.1
MSTRG.11401.4	Nitab4.5_0000003g0820.1
MSTRG.11401.5	Nitab4.5_0000003g0830.1
MSTRG.11425.1	Nitab4.5_0000003g0840.1
MSTRG.11427.1	Nitab4.5_0000003g0850.1
MSTRG.11427.2	Nitab4.5_0000003g0860.1
MSTRG.11452.1	Nitab4.5_0000003g0870.1
MSTRG.11453.1	Nitab4.5_0000003g0880.1
MSTRG.11461.1	Nitab4.5_0000003g0890.1
MSTRG.11464.1	Nitab4.5_0000003g0900.1
MSTRG.11469.1	Nitab4.5_0000003g0910.1
MSTRG.11478.1	Nitab4.5_0000003g0920.1
MSTRG.11499.1	Nitab4.5_0000003g0930.1
MSTRG.11500.1	Nitab4.5_0000003g0940.1
MSTRG.11504.1	Nitab4.5_0000003g0950.1
MSTRG.11511.1	Nitab4.5_0000004g0010.1
MSTRG.11523.1	Nitab4.5_0000004g0020.1
MSTRG.11523.2	Nitab4.5_0000004g0030.1
MSTRG.11529.3	Nitab4.5_0000004g0040.1
MSTRG.11529.4	Nitab4.5_0000004g0050.1
MSTRG.11529.5	Nitab4.5_0000004g0060.1
MSTRG.11529.6	Nitab4.5_0000004g0070.1
MSTRG.11552.1	Nitab4.5_0000004g0080.1
MSTRG.11557.1	Nitab4.5_0000004g0090.1
MSTRG.11562.1	Nitab4.5_0000004g0100.1
MSTRG.11563.1	Nitab4.5_0000004g0110.1
MSTRG.11572.1	Nitab4.5_0000004g0120.1
MSTRG.11590.3	Nitab4.5_0000004g0130.1
MSTRG.11598.1	Nitab4.5_0000004g0140.1
MSTRG.1160.1	Nitab4.5_0000004g0150.1
MSTRG.11600.1	Nitab4.5_0000004g0160.1
MSTRG.11601.1	Nitab4.5_0000004g0170.1
MSTRG.11603.1	Nitab4.5_0000004g0180.1
MSTRG.11604.1	Nitab4.5_0000004g0190.1
MSTRG.1163.1	Nitab4.5_0000004g0200.1
MSTRG.1166.1	Nitab4.5_0000004g0210.1
MSTRG.11673.2	Nitab4.5_0000004g0220.1
MSTRG.11673.3	Nitab4.5_0000004g0230.1
MSTRG.11673.4	Nitab4.5_0000004g0240.1
MSTRG.11674.1	Nitab4.5_0000004g0250.1
MSTRG.11677.1	Nitab4.5_0000004g0260.1
MSTRG.11681.1	Nitab4.5_0000004g0270.1
MSTRG.11681.10	Nitab4.5_0000004g0280.1
MSTRG.11681.11	Nitab4.5_0000004g0290.1
MSTRG.11681.2	Nitab4.5_0000004g0300.1
MSTRG.11681.3	Nitab4.5_0000004g0310.1
MSTRG.11681.4	Nitab4.5_0000004g0320.1
MSTRG.11681.5	Nitab4.5_0000004g0330.1
MSTRG.11681.6	Nitab4.5_0000004g0340.1
MSTRG.11681.7	Nitab4.5_0000004g0350.1
MSTRG.11681.8	Nitab4.5_0000004g0360.1
MSTRG.11681.9	Nitab4.5_0000005g0010.1
MSTRG.11694.1	Nitab4.5_0000005g0020.1
MSTRG.11698.1	Nitab4.5_0000005g0030.1
MSTRG.11699.1	Nitab4.5_0000005g0040.1
MSTRG.117.1	Nitab4.5_0000005g0050.1
MSTRG.117.2	Nitab4.5_0000005g0060.1
MSTRG.11706.3	Nitab4.5_0000005g0070.1
MSTRG.11710.1	Nitab4.5_0000005g0080.1
MSTRG.11713.1	Nitab4.5_0000005g0090.1
MSTRG.11735.1	Nitab4.5_0000005g0100.1
MSTRG.11744.1	Nitab4.5_0000005g0110.1
MSTRG.11747.1	Nitab4.5_0000005g0120.1
MSTRG.11747.2	Nitab4.5_0000005g0130.1
MSTRG.11750.1	Nitab4.5_0000005g0140.1
MSTRG.11757.1	Nitab4.5_0000005g0150.1
MSTRG.1176.1	Nitab4.5_0000005g0160.1
MSTRG.1177.1	Nitab4.5_0000005g0170.1
MSTRG.11772.1	Nitab4.5_0000005g0180.1
MSTRG.11772.3	Nitab4.5_0000005g0190.1
MSTRG.11778.1	Nitab4.5_0000005g0200.1
MSTRG.11779.1	Nitab4.5_0000005g0210.1
MSTRG.11784.1	Nitab4.5_0000005g0220.1
MSTRG.11788.1	Nitab4.5_0000005g0230.1
MSTRG.11801.1	Nitab4.5_0000005g0240.1
MSTRG.11809.1	Nitab4.5_0000005g0250.1
MSTRG.1181.1	Nitab4.5_0000005g0260.1
MSTRG.1181.2	Nitab4.5_0000005g0270.1
MSTRG.1182.1	Nitab4.5_0000005g0280.1
MSTRG.11834.1	Nitab4.5_0000005g0290.1
MSTRG.11835.1	Nitab4.5_0000005g0300.1
MSTRG.11848.1	Nitab4.5_0000005g0310.1
MSTRG.1185.1	Nitab4.5_0000005g0320.1
MSTRG.11855.1	Nitab4.5_0000005g0330.1
MSTRG.1186.1	Nitab4.5_0000005g0340.1
MSTRG.11863.1	Nitab4.5_0000005g0350.1
MSTRG.11868.1	Nitab4.5_0000005g0360.1
MSTRG.1187.1	Nitab4.5_0000005g0370.1
MSTRG.11877.1	Nitab4.5_0000005g0380.1
MSTRG.11878.1	Nitab4.5_0000005g0390.1
MSTRG.11900.1	Nitab4.5_0000005g0400.1
MSTRG.11906.1	Nitab4.5_0000005g0410.1
MSTRG.11913.1	Nitab4.5_0000005g0420.1
MSTRG.11943.1	Nitab4.5_0000005g0430.1
MSTRG.11944.1	Nitab4.5_0000005g0440.1
MSTRG.11950.1	Nitab4.5_0000005g0450.1
MSTRG.11965.1	Nitab4.5_0000005g0460.1
MSTRG.11966.1	Nitab4.5_0000005g0470.1
MSTRG.11983.1	Nitab4.5_0000005g0480.1
MSTRG.11991.6	Nitab4.5_0000005g0490.1
MSTRG.12.1	Nitab4.5_0000005g0500.1
MSTRG.12008.1	Nitab4.5_0000005g0510.1
MSTRG.12010.1	Nitab4.5_0000005g0520.1
MSTRG.12014.1	Nitab4.5_0000005g0530.1
MSTRG.12033.1	Nitab4.5_0000005g0540.1
MSTRG.12049.1	Nitab4.5_0000005g0550.1
MSTRG.12079.1	Nitab4.5_0000005g0560.1
MSTRG.12085.1	Nitab4.5_0000005g0570.1
MSTRG.12092.1	Nitab4.5_0000005g0580.1
MSTRG.12097.1	Nitab4.5_0000005g0590.1
MSTRG.12102.1	Nitab4.5_0000006g0010.1
MSTRG.12104.1	Nitab4.5_0000006g0020.1
MSTRG.12104.2	Nitab4.5_0000006g0030.1
MSTRG.12105.1	Nitab4.5_0000006g0040.1
MSTRG.12129.1	Nitab4.5_0000006g0050.1
MSTRG.12129.2	Nitab4.5_0000006g0060.1
MSTRG.12129.3	Nitab4.5_0000006g0070.1
MSTRG.12136.1	Nitab4.5_0000006g0080.1
MSTRG.12137.1	Nitab4.5_0000006g0090.1
MSTRG.12138.1	Nitab4.5_0000006g0100.1
MSTRG.12140.1	Nitab4.5_0000006g0110.1
MSTRG.12148.1	Nitab4.5_0000006g0120.1
MSTRG.12152.1	Nitab4.5_0000006g0130.1
MSTRG.12152.2	Nitab4.5_0000006g0140.1
MSTRG.12158.1	Nitab4.5_0000006g0150.1
MSTRG.12159.1	Nitab4.5_0000006g0160.1
MSTRG.12175.1	Nitab4.5_0000006g0170.1
MSTRG.12176.1	Nitab4.5_0000006g0180.1
MSTRG.12191.1	Nitab4.5_0000006g0190.1
MSTRG.12192.1	Nitab4.5_0000006g0200.1
MSTRG.12194.1	Nitab4.5_0000006g0210.1
MSTRG.12195.1	Nitab4.5_0000006g0220.1
MSTRG.12197.1	Nitab4.5_0000006g0230.1
MSTRG.12198.1	Nitab4.5_0000006g0240.1
MSTRG.12202.9	Nitab4.5_0000006g0250.1
MSTRG.12205.1	Nitab4.5_0000006g0260.1
MSTRG.12208.1	Nitab4.5_0000006g0270.1
MSTRG.12227.1	Nitab4.5_0000006g0280.1
MSTRG.12243.1	Nitab4.5_0000006g0290.1
MSTRG.12250.2	Nitab4.5_0000006g0300.1
MSTRG.12260.1	Nitab4.5_0000006g0310.1
MSTRG.12266.1	Nitab4.5_0000006g0320.1
MSTRG.12270.1	Nitab4.5_0000006g0330.1
MSTRG.12284.1	Nitab4.5_0000006g0340.1
MSTRG.12284.2	Nitab4.5_0000006g0350.1
MSTRG.12287.1	Nitab4.5_0000006g0360.1
MSTRG.12288.1	Nitab4.5_0000006g0370.1
MSTRG.12293.1	Nitab4.5_0000006g0380.1
MSTRG.12294.1	Nitab4.5_0000006g0390.1
MSTRG.12317.1	Nitab4.5_0000006g0400.1
MSTRG.12317.2	Nitab4.5_0000006g0410.1
MSTRG.12317.3	Nitab4.5_0000006g0420.1
MSTRG.12317.4	Nitab4.5_0000006g0430.1
MSTRG.12317.5	Nitab4.5_0000006g0440.1
MSTRG.12317.6	Nitab4.5_0000006g0450.1
MSTRG.12324.1	Nitab4.5_0000006g0460.1
MSTRG.12329.1	Nitab4.5_0000006g0470.1
MSTRG.12329.2	Nitab4.5_0000006g0480.1
MSTRG.12348.1	Nitab4.5_0000006g0490.1
MSTRG.12352.1	Nitab4.5_0000006g0500.1
MSTRG.12352.3	Nitab4.5_0000006g0510.1
MSTRG.12356.1	Nitab4.5_0000006g0520.1
MSTRG.12364.1	Nitab4.5_0000006g0530.1
MSTRG.12371.1	Nitab4.5_0000006g0540.1
MSTRG.12374.1	Nitab4.5_0000006g0550.1
MSTRG.12375.1	Nitab4.5_0000006g0560.1
MSTRG.12376.1	Nitab4.5_0000006g0570.1
MSTRG.12408.1	Nitab4.5_0000006g0580.1
MSTRG.12426.1	Nitab4.5_0000006g0590.1
MSTRG.12431.1	Nitab4.5_0000006g0600.1
MSTRG.12442.1	Nitab4.5_0000006g0610.1
MSTRG.12443.1	Nitab4.5_0000006g0620.1
MSTRG.12444.1	Nitab4.5_0000006g0630.1
MSTRG.12444.2	Nitab4.5_0000006g0640.1
MSTRG.12453.1	Nitab4.5_0000006g0650.1
MSTRG.12454.1	Nitab4.5_0000006g0660.1
MSTRG.12455.1	Nitab4.5_0000006g0670.1
MSTRG.12457.3	Nitab4.5_0000006g0680.1
MSTRG.1247.1	Nitab4.5_0000006g0690.1
MSTRG.12471.1	Nitab4.5_0000006g0700.1
MSTRG.12471.2	Nitab4.5_0000007g0010.1
MSTRG.12471.3	Nitab4.5_0000007g0020.1
MSTRG.12480.1	Nitab4.5_0000007g0030.1
MSTRG.12480.2	Nitab4.5_0000007g0040.1
MSTRG.12480.3	Nitab4.5_0000007g0050.1
MSTRG.12496.4	Nitab4.5_0000007g0060.1
MSTRG.12496.5	Nitab4.5_0000007g0070.1
MSTRG.12500.1	Nitab4.5_0000007g0080.1
MSTRG.12501.2	Nitab4.5_0000007g0090.1
MSTRG.12540.1	Nitab4.5_0000007g0100.1
MSTRG.12558.3	Nitab4.5_0000007g0110.1
MSTRG.12558.4	Nitab4.5_0000007g0120.1
MSTRG.12564.1	Nitab4.5_0000007g0130.1
MSTRG.12564.2	Nitab4.5_0000007g0140.1
MSTRG.12573.2	Nitab4.5_0000007g0150.1
MSTRG.12595.1	Nitab4.5_0000007g0160.1
MSTRG.12609.1	Nitab4.5_0000007g0170.1
MSTRG.12627.1	Nitab4.5_0000007g0180.1
MSTRG.12636.1	Nitab4.5_0000007g0190.1
MSTRG.12639.1	Nitab4.5_0000007g0200.1
MSTRG.1264.1	Nitab4.5_0000007g0210.1
MSTRG.12647.1	Nitab4.5_0000007g0220.1
MSTRG.12648.1	Nitab4.5_0000007g0230.1
MSTRG.12651.1	Nitab4.5_0000007g0240.1
MSTRG.12651.2	Nitab4.5_0000007g0250.1
MSTRG.12655.1	Nitab4.5_0000007g0260.1
MSTRG.1266.1	Nitab4.5_0000007g0270.1
MSTRG.12663.1	Nitab4.5_0000007g0280.1
MSTRG.12664.1	Nitab4.5_0000007g0290.1
MSTRG.12664.2	Nitab4.5_0000007g0300.1
MSTRG.12685.1	Nitab4.5_0000007g0310.1
MSTRG.12692.1	Nitab4.5_0000007g0320.1
MSTRG.12692.3	Nitab4.5_0000007g0330.1
MSTRG.12692.4	Nitab4.5_0000007g0340.1
MSTRG.12692.5	Nitab4.5_0000007g0350.1
MSTRG.12695.1	Nitab4.5_0000007g0360.1
MSTRG.12696.3	Nitab4.5_0000007g0370.1
MSTRG.12699.1	Nitab4.5_0000007g0380.1
MSTRG.12703.1	Nitab4.5_0000007g0390.1
MSTRG.1271.1	Nitab4.5_0000007g0400.1
MSTRG.12715.1	Nitab4.5_0000007g0410.1
MSTRG.12717.1	Nitab4.5_0000007g0420.1
MSTRG.12723.4	Nitab4.5_0000008g0010.1
MSTRG.12723.5	Nitab4.5_0000008g0020.1
MSTRG.12737.1	Nitab4.5_0000008g0030.1
MSTRG.12737.3	Nitab4.5_0000008g0040.1
MSTRG.12737.4	Nitab4.5_0000008g0050.1
MSTRG.12737.5	Nitab4.5_0000008g0060.1
MSTRG.12737.7	Nitab4.5_0000008g0070.1
MSTRG.1274.1	Nitab4.5_0000008g0080.1
MSTRG.12740.1	Nitab4.5_0000008g0090.1
MSTRG.12742.1	Nitab4.5_0000008g0100.1
MSTRG.1276.1	Nitab4.5_0000008g0110.1
MSTRG.12760.1	Nitab4.5_0000008g0120.1
MSTRG.12763.1	Nitab4.5_0000008g0130.1
MSTRG.12763.2	Nitab4.5_0000008g0140.1
MSTRG.12763.3	Nitab4.5_0000008g0150.1
MSTRG.12763.4	Nitab4.5_0000008g0160.1
MSTRG.1277.1	Nitab4.5_0000008g0170.1
MSTRG.12771.1	Nitab4.5_0000008g0180.1
MSTRG.12772.1	Nitab4.5_0000008g0190.1
MSTRG.12775.1	Nitab4.5_0000008g0200.1
MSTRG.12784.1	Nitab4.5_0000008g0210.1
MSTRG.1279.1	Nitab4.5_0000008g0220.1
MSTRG.12797.1	Nitab4.5_0000008g0230.1
MSTRG.12799.1	Nitab4.5_0000008g0240.1
MSTRG.12803.1	Nitab4.5_0000008g0250.1
MSTRG.12805.1	Nitab4.5_0000008g0260.1
MSTRG.12805.2	Nitab4.5_0000008g0270.1
MSTRG.12805.3	Nitab4.5_0000008g0280.1
MSTRG.12805.4	Nitab4.5_0000008g0290.1
MSTRG.12805.5	Nitab4.5_0000008g0300.1
MSTRG.12811.1	Nitab4.5_0000008g0310.1
MSTRG.12811.2	Nitab4.5_0000008g0320.1
MSTRG.12811.3	Nitab4.5_0000008g0330.1
MSTRG.12811.4	Nitab4.5_0000008g0340.1
MSTRG.12817.2	Nitab4.5_0000008g0350.1
MSTRG.12819.1	Nitab4.5_0000008g0360.1
MSTRG.12820.1	Nitab4.5_0000008g0370.1
MSTRG.12825.1	Nitab4.5_0000008g0380.1
MSTRG.12842.1	Nitab4.5_0000008g0390.1
MSTRG.12843.1	Nitab4.5_0000008g0400.1
MSTRG.12844.1	Nitab4.5_0000008g0410.1
MSTRG.12847.1	Nitab4.5_0000008g0420.1
MSTRG.12851.1	Nitab4.5_0000008g0430.1
MSTRG.12853.1	Nitab4.5_0000008g0440.1
MSTRG.12865.1	Nitab4.5_0000008g0450.1
MSTRG.12875.2	Nitab4.5_0000008g0460.1
MSTRG.12885.1	Nitab4.5_0000008g0470.1
MSTRG.12897.1	Nitab4.5_0000008g0480.1
MSTRG.12897.2	Nitab4.5_0000008g0490.1
MSTRG.12898.1	Nitab4.5_0000008g0500.1
MSTRG.12898.2	Nitab4.5_0000008g0510.1
MSTRG.12898.3	Nitab4.5_0000008g0520.1
MSTRG.12912.1	Nitab4.5_0000008g0530.1
MSTRG.12926.1	Nitab4.5_0000008g0540.1
MSTRG.12931.1	Nitab4.5_0000008g0550.1
MSTRG.12933.1	Nitab4.5_0000008g0560.1
MSTRG.12933.2	Nitab4.5_0000008g0570.1
MSTRG.12933.3	Nitab4.5_0000008g0580.1
MSTRG.12935.1	Nitab4.5_0000008g0590.1
MSTRG.12935.2	Nitab4.5_0000008g0600.1
MSTRG.12939.1	Nitab4.5_0000008g0610.1
MSTRG.12962.1	Nitab4.5_0000008g0620.1
MSTRG.12974.1	Nitab4.5_0000008g0630.1
MSTRG.12977.1	Nitab4.5_0000008g0640.1
MSTRG.1298.1	Nitab4.5_0000008g0650.1
MSTRG.12996.1	Nitab4.5_0000008g0660.1
MSTRG.130.1	Nitab4.5_0000008g0670.1
MSTRG.130.2	Nitab4.5_0000008g0680.1
MSTRG.1300.2	Nitab4.5_0000008g0690.1
MSTRG.13009.1	Nitab4.5_0000008g0700.1
MSTRG.1304.1	Nitab4.5_0000008g0710.1
MSTRG.13040.1	Nitab4.5_0000008g0720.1
MSTRG.13041.1	Nitab4.5_0000008g0730.1
MSTRG.13055.2	Nitab4.5_0000008g0740.1
MSTRG.13080.1	Nitab4.5_0000008g0750.1
MSTRG.13089.1	Nitab4.5_0000008g0760.1
MSTRG.13095.1	Nitab4.5_0000008g0770.1
MSTRG.13097.1	Nitab4.5_0000008g0780.1
MSTRG.13097.2	Nitab4.5_0000008g0790.1
MSTRG.13100.1	Nitab4.5_0000008g0800.1
MSTRG.13112.1	Nitab4.5_0000008g0810.1
MSTRG.13112.2	Nitab4.5_0000008g0820.1
MSTRG.13112.3	Nitab4.5_0000008g0830.1
MSTRG.13112.4	Nitab4.5_0000008g0840.1
MSTRG.13112.5	Nitab4.5_0000008g0850.1
MSTRG.13112.6	Nitab4.5_0000008g0860.1
MSTRG.13114.1	Nitab4.5_0000008g0870.1
MSTRG.13114.2	Nitab4.5_0000008g0880.1
MSTRG.13115.1	Nitab4.5_0000008g0890.1
MSTRG.13115.2	Nitab4.5_0000008g0900.1
MSTRG.13115.3	Nitab4.5_0000008g0910.1
MSTRG.13115.4	Nitab4.5_0000008g0920.1
MSTRG.13133.1	Nitab4.5_0000009g0010.1
MSTRG.13134.1	Nitab4.5_0000009g0020.1
MSTRG.13138.1	Nitab4.5_0000009g0030.1
MSTRG.13142.1	Nitab4.5_0000009g0040.1
MSTRG.13143.1	Nitab4.5_0000009g0050.1
MSTRG.13144.1	Nitab4.5_0000009g0060.1
MSTRG.13151.1	Nitab4.5_0000009g0070.1
MSTRG.13155.1	Nitab4.5_0000009g0080.1
MSTRG.13171.1	Nitab4.5_0000009g0090.1
MSTRG.13173.1	Nitab4.5_0000009g0100.1
MSTRG.13175.1	Nitab4.5_0000009g0110.1
MSTRG.13178.1	Nitab4.5_0000009g0120.1
MSTRG.13184.1	Nitab4.5_0000009g0130.1
MSTRG.13185.1	Nitab4.5_0000009g0140.1
MSTRG.13187.1	Nitab4.5_0000009g0150.1
MSTRG.13187.2	Nitab4.5_0000009g0160.1
MSTRG.13189.1	Nitab4.5_0000009g0170.1
MSTRG.1319.1	Nitab4.5_0000009g0180.1
MSTRG.13191.1	Nitab4.5_0000009g0190.1
MSTRG.13191.2	Nitab4.5_0000009g0200.1
MSTRG.13191.3	Nitab4.5_0000009g0210.1
MSTRG.13191.4	Nitab4.5_0000009g0220.1
MSTRG.13194.1	Nitab4.5_0000009g0230.1
MSTRG.13194.2	Nitab4.5_0000009g0240.1
MSTRG.13195.1	Nitab4.5_0000009g0250.1
MSTRG.13197.1	Nitab4.5_0000009g0260.1
MSTRG.13197.2	Nitab4.5_0000009g0270.1
MSTRG.13201.1	Nitab4.5_0000009g0280.1
MSTRG.13222.1	Nitab4.5_0000009g0290.1
MSTRG.13223.1	Nitab4.5_0000009g0300.1
MSTRG.13229.1	Nitab4.5_0000009g0310.1
MSTRG.13255.1	Nitab4.5_0000009g0320.1
MSTRG.13258.1	Nitab4.5_0000009g0330.1
MSTRG.13259.2	Nitab4.5_0000009g0340.1
MSTRG.13265.1	Nitab4.5_0000009g0350.1
MSTRG.13267.1	Nitab4.5_0000009g0360.1
MSTRG.13268.1	Nitab4.5_0000009g0370.1
MSTRG.13270.1	Nitab4.5_0000009g0380.1
MSTRG.13271.1	Nitab4.5_0000009g0390.1
MSTRG.13276.1	Nitab4.5_0000009g0400.1
MSTRG.13279.2	Nitab4.5_0000009g0410.1
MSTRG.13281.1	Nitab4.5_0000009g0420.1
MSTRG.13288.1	Nitab4.5_0000009g0430.1
MSTRG.13291.1	Nitab4.5_0000009g0440.1
MSTRG.133.1	Nitab4.5_0000009g0450.1
MSTRG.13307.1	Nitab4.5_0000009g0460.1
MSTRG.13307.2	Nitab4.5_0000009g0470.1
MSTRG.13308.1	Nitab4.5_0000009g0480.1
MSTRG.13319.2	Nitab4.5_0000009g0490.1
MSTRG.13319.6	Nitab4.5_0000009g0500.1
MSTRG.13332.1	Nitab4.5_0000009g0510.1
MSTRG.13332.2	Nitab4.5_0000009g0520.1
MSTRG.13333.1	Nitab4.5_0000009g0530.1
MSTRG.13337.1	Nitab4.5_0000010g0010.1
MSTRG.1334.1	Nitab4.5_0000010g0020.1
MSTRG.13346.1	Nitab4.5_0000010g0030.1
MSTRG.13347.2	Nitab4.5_0000010g0040.1
MSTRG.13347.3	Nitab4.5_0000010g0050.1
MSTRG.13352.1	Nitab4.5_0000010g0060.1
MSTRG.13356.1	Nitab4.5_0000010g0070.1
MSTRG.13358.4	Nitab4.5_0000010g0080.1
MSTRG.13358.5	Nitab4.5_0000010g0090.1
MSTRG.13362.1	Nitab4.5_0000010g0100.1
MSTRG.13372.1	Nitab4.5_0000010g0110.1
MSTRG.13373.1	Nitab4.5_0000010g0120.1
MSTRG.13374.1	Nitab4.5_0000010g0130.1
MSTRG.13414.1	Nitab4.5_0000010g0140.1
MSTRG.13416.1	Nitab4.5_0000010g0150.1
MSTRG.1343.1	Nitab4.5_0000010g0160.1
MSTRG.13465.1	Nitab4.5_0000010g0170.1
MSTRG.13472.1	Nitab4.5_0000010g0180.1
MSTRG.13479.1	Nitab4.5_0000010g0190.1
MSTRG.13482.1	Nitab4.5_0000010g0200.1
MSTRG.13506.1	Nitab4.5_0000010g0210.1
MSTRG.13511.1	Nitab4.5_0000010g0220.1
MSTRG.13524.1	Nitab4.5_0000010g0230.1
MSTRG.13525.1	Nitab4.5_0000010g0240.1
MSTRG.13525.2	Nitab4.5_0000010g0250.1
MSTRG.13528.1	Nitab4.5_0000010g0260.1
MSTRG.13538.1	Nitab4.5_0000010g0270.1
MSTRG.13554.1	Nitab4.5_0000010g0280.1
MSTRG.13559.1	Nitab4.5_0000010g0290.1
MSTRG.13569.1	Nitab4.5_0000010g0300.1
MSTRG.13579.1	Nitab4.5_0000011g0010.1
MSTRG.13580.1	Nitab4.5_0000011g0020.1
MSTRG.13582.1	Nitab4.5_0000011g0030.1
MSTRG.13582.2	Nitab4.5_0000011g0040.1
MSTRG.136.1	Nitab4.5_0000011g0050.1
MSTRG.13602.1	Nitab4.5_0000011g0060.1
MSTRG.13607.1	Nitab4.5_0000011g0070.1
MSTRG.13608.1	Nitab4.5_0000011g0080.1
MSTRG.13629.1	Nitab4.5_0000011g0090.1
MSTRG.13629.2	Nitab4.5_0000011g0100.1
MSTRG.13631.1	Nitab4.5_0000011g0110.1
MSTRG.13631.2	Nitab4.5_0000011g0120.1
MSTRG.13632.1	Nitab4.5_0000011g0130.1
MSTRG.13635.1	Nitab4.5_0000011g0140.1
MSTRG.13636.1	Nitab4.5_0000011g0150.1
MSTRG.13643.1	Nitab4.5_0000011g0160.1
MSTRG.13648.1	Nitab4.5_0000011g0170.1
MSTRG.13649.1	Nitab4.5_0000011g0180.1
MSTRG.13650.1	Nitab4.5_0000011g0190.1
MSTRG.13658.1	Nitab4.5_0000011g0200.1
MSTRG.13661.1	Nitab4.5_0000011g0210.1
MSTRG.13663.1	Nitab4.5_0000011g0220.1
MSTRG.13665.2	Nitab4.5_0000011g0230.1
MSTRG.13676.1	Nitab4.5_0000011g0240.1
MSTRG.13676.2	Nitab4.5_0000011g0250.1
MSTRG.13683.1	Nitab4.5_0000011g0260.1
MSTRG.13686.1	Nitab4.5_0000011g0270.1
MSTRG.13690.1	Nitab4.5_0000011g0280.1
MSTRG.13691.1	Nitab4.5_0000011g0290.1
MSTRG.13706.1	Nitab4.5_0000011g0300.1
MSTRG.13707.1	Nitab4.5_0000011g0310.1
MSTRG.1371.1	Nitab4.5_0000011g0320.1
MSTRG.1371.2	Nitab4.5_0000011g0330.1
MSTRG.1371.3	Nitab4.5_0000011g0340.1
MSTRG.13710.1	Nitab4.5_0000011g0350.1
MSTRG.13718.1	Nitab4.5_0000011g0360.1
MSTRG.1373.1	Nitab4.5_0000011g0370.1
MSTRG.13736.1	Nitab4.5_0000011g0380.1
MSTRG.13737.1	Nitab4.5_0000011g0390.1
MSTRG.13737.2	Nitab4.5_0000012g0010.1
MSTRG.13738.1	Nitab4.5_0000012g0020.1
MSTRG.1374.1	Nitab4.5_0000012g0030.1
MSTRG.13742.1	Nitab4.5_0000012g0040.1
MSTRG.13749.9	Nitab4.5_0000012g0050.1
MSTRG.1375.1	Nitab4.5_0000012g0060.1
MSTRG.13760.1	Nitab4.5_0000012g0070.1
MSTRG.13765.1	Nitab4.5_0000012g0080.1
MSTRG.13785.1	Nitab4.5_0000012g0090.1
MSTRG.13788.1	Nitab4.5_0000012g0100.1
MSTRG.13794.1	Nitab4.5_0000012g0110.1
MSTRG.13796.1	Nitab4.5_0000012g0120.1
MSTRG.13796.2	Nitab4.5_0000012g0130.1
MSTRG.13797.1	Nitab4.5_0000012g0140.1
MSTRG.13798.1	Nitab4.5_0000012g0150.1
MSTRG.138.1	Nitab4.5_0000012g0160.1
MSTRG.13802.1	Nitab4.5_0000012g0170.1
MSTRG.13804.1	Nitab4.5_0000012g0180.1
MSTRG.13807.1	Nitab4.5_0000012g0190.1
MSTRG.13807.2	Nitab4.5_0000012g0200.1
MSTRG.13816.1	Nitab4.5_0000012g0210.1
MSTRG.13838.1	Nitab4.5_0000012g0220.1
MSTRG.13838.2	Nitab4.5_0000012g0230.1
MSTRG.13839.1	Nitab4.5_0000012g0240.1
MSTRG.1384.1	Nitab4.5_0000012g0250.1
MSTRG.13844.1	Nitab4.5_0000012g0260.1
MSTRG.13845.1	Nitab4.5_0000012g0270.1
MSTRG.13846.23	Nitab4.5_0000012g0280.1
MSTRG.13847.1	Nitab4.5_0000012g0290.1
MSTRG.13848.2	Nitab4.5_0000012g0300.1
MSTRG.13849.1	Nitab4.5_0000012g0310.1
MSTRG.13867.1	Nitab4.5_0000012g0320.1
MSTRG.13869.1	Nitab4.5_0000012g0330.1
MSTRG.13870.2	Nitab4.5_0000012g0340.1
MSTRG.13876.1	Nitab4.5_0000012g0350.1
MSTRG.13879.1	Nitab4.5_0000012g0360.1
MSTRG.1388.1	Nitab4.5_0000013g0010.1
MSTRG.139.1	Nitab4.5_0000013g0020.1
MSTRG.139.2	Nitab4.5_0000013g0030.1
MSTRG.13900.1	Nitab4.5_0000013g0040.1
MSTRG.13902.1	Nitab4.5_0000013g0050.1
MSTRG.13902.4	Nitab4.5_0000013g0060.1
MSTRG.13903.1	Nitab4.5_0000013g0070.1
MSTRG.13924.1	Nitab4.5_0000013g0080.1
MSTRG.13931.2	Nitab4.5_0000013g0090.1
MSTRG.13948.1	Nitab4.5_0000013g0100.1
MSTRG.1396.3	Nitab4.5_0000013g0110.1
MSTRG.13965.2	Nitab4.5_0000013g0120.1
MSTRG.13974.1	Nitab4.5_0000013g0130.1
MSTRG.1398.1	Nitab4.5_0000013g0140.1
MSTRG.13981.1	Nitab4.5_0000013g0150.1
MSTRG.13981.2	Nitab4.5_0000013g0160.1
MSTRG.13986.3	Nitab4.5_0000013g0170.1
MSTRG.14006.1	Nitab4.5_0000013g0180.1
MSTRG.14013.1	Nitab4.5_0000013g0190.1
MSTRG.14025.1	Nitab4.5_0000013g0200.1
MSTRG.1404.1	Nitab4.5_0000013g0210.1
MSTRG.14040.1	Nitab4.5_0000013g0220.1
MSTRG.14048.1	Nitab4.5_0000013g0230.1
MSTRG.14048.2	Nitab4.5_0000013g0240.1
MSTRG.14049.1	Nitab4.5_0000013g0250.1
MSTRG.1406.1	Nitab4.5_0000013g0260.1
MSTRG.14060.1	Nitab4.5_0000013g0270.1
MSTRG.14062.1	Nitab4.5_0000013g0280.1
MSTRG.14063.1	Nitab4.5_0000013g0290.1
MSTRG.14065.1	Nitab4.5_0000013g0300.1
MSTRG.14066.1	Nitab4.5_0000013g0310.1
MSTRG.14067.1	Nitab4.5_0000013g0320.1
MSTRG.1407.2	Nitab4.5_0000013g0330.1
MSTRG.14081.1	Nitab4.5_0000013g0340.1
MSTRG.14082.1	Nitab4.5_0000013g0350.1
MSTRG.14084.1	Nitab4.5_0000013g0360.1
MSTRG.14087.1	Nitab4.5_0000013g0370.1
MSTRG.14091.1	Nitab4.5_0000013g0380.1
MSTRG.14094.1	Nitab4.5_0000013g0390.1
MSTRG.14095.1	Nitab4.5_0000013g0400.1
MSTRG.14105.1	Nitab4.5_0000013g0410.1
MSTRG.14106.1	Nitab4.5_0000013g0420.1
MSTRG.14112.1	Nitab4.5_0000013g0430.1
MSTRG.14118.1	Nitab4.5_0000013g0440.1
MSTRG.14118.2	Nitab4.5_0000013g0450.1
MSTRG.14118.3	Nitab4.5_0000013g0460.1
MSTRG.14172.1	Nitab4.5_0000013g0470.1
MSTRG.14172.2	Nitab4.5_0000013g0480.1
MSTRG.14175.1	Nitab4.5_0000013g0490.1
MSTRG.14176.1	Nitab4.5_0000013g0500.1
MSTRG.14193.1	Nitab4.5_0000013g0510.1
MSTRG.14195.2	Nitab4.5_0000013g0520.1
MSTRG.14195.5	Nitab4.5_0000013g0530.1
MSTRG.14197.1	Nitab4.5_0000013g0540.1
MSTRG.14197.2	Nitab4.5_0000013g0550.1
MSTRG.14197.3	Nitab4.5_0000013g0560.1
MSTRG.14204.1	Nitab4.5_0000013g0570.1
MSTRG.14205.1	Nitab4.5_0000013g0580.1
MSTRG.14210.1	Nitab4.5_0000013g0590.1
MSTRG.14219.1	Nitab4.5_0000013g0600.1
MSTRG.14220.1	Nitab4.5_0000014g0010.1
MSTRG.14234.1	Nitab4.5_0000014g0020.1
MSTRG.14234.2	Nitab4.5_0000014g0030.1
MSTRG.14236.3	Nitab4.5_0000014g0040.1
MSTRG.14236.4	Nitab4.5_0000014g0050.1
MSTRG.14236.5	Nitab4.5_0000014g0060.1
MSTRG.14236.6	Nitab4.5_0000014g0070.1
MSTRG.14237.1	Nitab4.5_0000014g0080.1
MSTRG.14238.1	Nitab4.5_0000014g0090.1
MSTRG.14241.1	Nitab4.5_0000014g0100.1
MSTRG.14241.4	Nitab4.5_0000014g0110.1
MSTRG.14241.5	Nitab4.5_0000014g0120.1
MSTRG.14246.1	Nitab4.5_0000014g0130.1
MSTRG.14248.2	Nitab4.5_0000014g0140.1
MSTRG.14257.1	Nitab4.5_0000014g0150.1
MSTRG.14257.2	Nitab4.5_0000014g0160.1
MSTRG.14262.1	Nitab4.5_0000014g0170.1
MSTRG.14263.1	Nitab4.5_0000014g0180.1
MSTRG.1428.1	Nitab4.5_0000014g0190.1
MSTRG.14285.1	Nitab4.5_0000014g0200.1
MSTRG.14286.1	Nitab4.5_0000014g0210.1
MSTRG.14287.1	Nitab4.5_0000014g0220.1
MSTRG.14288.1	Nitab4.5_0000014g0230.1
MSTRG.14288.3	Nitab4.5_0000014g0240.1
MSTRG.14289.1	Nitab4.5_0000014g0250.1
MSTRG.14289.2	Nitab4.5_0000014g0260.1
MSTRG.14291.1	Nitab4.5_0000014g0270.1
MSTRG.14292.1	Nitab4.5_0000014g0280.1
MSTRG.14297.1	Nitab4.5_0000014g0290.1
MSTRG.14297.2	Nitab4.5_0000014g0300.1
MSTRG.143.1	Nitab4.5_0000014g0310.1
MSTRG.143.2	Nitab4.5_0000014g0320.1
MSTRG.143.3	Nitab4.5_0000014g0330.1
MSTRG.14344.1	Nitab4.5_0000014g0340.1
MSTRG.14345.1	Nitab4.5_0000014g0350.1
MSTRG.14348.1	Nitab4.5_0000014g0360.1
MSTRG.14354.1	Nitab4.5_0000014g0370.1
MSTRG.14356.1	Nitab4.5_0000014g0380.1
MSTRG.14356.2	Nitab4.5_0000014g0390.1
MSTRG.14357.1	Nitab4.5_0000014g0400.1
MSTRG.14371.1	Nitab4.5_0000014g0410.1
MSTRG.14378.1	Nitab4.5_0000014g0420.1
MSTRG.14379.1	Nitab4.5_0000014g0430.1
MSTRG.14379.2	Nitab4.5_0000014g0440.1
MSTRG.14385.1	Nitab4.5_0000014g0450.1
MSTRG.1439.1	Nitab4.5_0000014g0460.1
MSTRG.14397.1	Nitab4.5_0000014g0470.1
MSTRG.14397.2	Nitab4.5_0000014g0480.1
MSTRG.14397.3	Nitab4.5_0000014g0490.1
MSTRG.14398.1	Nitab4.5_0000014g0500.1
MSTRG.14402.1	Nitab4.5_0000014g0510.1
MSTRG.14403.1	Nitab4.5_0000014g0520.1
MSTRG.14404.1	Nitab4.5_0000014g0530.1
MSTRG.14405.1	Nitab4.5_0000014g0540.1
MSTRG.14406.1	Nitab4.5_0000014g0550.1
MSTRG.14407.1	Nitab4.5_0000015g0010.1
MSTRG.14420.1	Nitab4.5_0000015g0020.1
MSTRG.14421.1	Nitab4.5_0000015g0030.1
MSTRG.1443.1	Nitab4.5_0000015g0040.1
MSTRG.14442.1	Nitab4.5_0000015g0050.1
MSTRG.1445.1	Nitab4.5_0000015g0060.1
MSTRG.14460.1	Nitab4.5_0000015g0070.1
MSTRG.14469.1	Nitab4.5_0000015g0080.1
MSTRG.1447.1	Nitab4.5_0000015g0090.1
MSTRG.1447.2	Nitab4.5_0000015g0100.1
MSTRG.14470.1	Nitab4.5_0000015g0110.1
MSTRG.14471.1	Nitab4.5_0000015g0120.1
MSTRG.14472.1	Nitab4.5_0000015g0130.1
MSTRG.14473.1	Nitab4.5_0000015g0140.1
MSTRG.14473.2	Nitab4.5_0000015g0150.1
MSTRG.14473.3	Nitab4.5_0000015g0160.1
MSTRG.14475.1	Nitab4.5_0000015g0170.1
MSTRG.14485.1	Nitab4.5_0000015g0180.1
MSTRG.14528.1	Nitab4.5_0000015g0190.1
MSTRG.14529.1	Nitab4.5_0000015g0200.1
MSTRG.14534.1	Nitab4.5_0000015g0210.1
MSTRG.14535.1	Nitab4.5_0000015g0220.1
MSTRG.14539.1	Nitab4.5_0000015g0230.1
MSTRG.14539.2	Nitab4.5_0000015g0240.1
MSTRG.14540.1	Nitab4.5_0000015g0250.1
MSTRG.14542.1	Nitab4.5_0000015g0260.1
MSTRG.14561.1	Nitab4.5_0000015g0270.1
MSTRG.14568.1	Nitab4.5_0000015g0280.1
MSTRG.14569.2	Nitab4.5_0000015g0290.1
MSTRG.14571.2	Nitab4.5_0000015g0300.1
MSTRG.14572.2	Nitab4.5_0000015g0310.1
MSTRG.14572.3	Nitab4.5_0000015g0320.1
MSTRG.14581.1	Nitab4.5_0000015g0330.1
MSTRG.14582.1	Nitab4.5_0000015g0340.1
MSTRG.1460.1	Nitab4.5_0000015g0350.1
MSTRG.1460.2	Nitab4.5_0000015g0360.1
MSTRG.1460.3	Nitab4.5_0000015g0370.1
MSTRG.14604.1	Nitab4.5_0000015g0380.1
MSTRG.14615.1	Nitab4.5_0000015g0390.1
MSTRG.14615.2	Nitab4.5_0000016g0010.1
MSTRG.14630.1	Nitab4.5_0000016g0020.1
MSTRG.14630.2	Nitab4.5_0000016g0030.1
MSTRG.14652.1	Nitab4.5_0000016g0040.1
MSTRG.14653.2	Nitab4.5_0000016g0050.1
MSTRG.14659.1	Nitab4.5_0000016g0060.1
MSTRG.14660.1	Nitab4.5_0000016g0070.1
MSTRG.14663.1	Nitab4.5_0000016g0080.1
MSTRG.14667.1	Nitab4.5_0000016g0090.1
MSTRG.14667.4	Nitab4.5_0000016g0100.1
MSTRG.14667.5	Nitab4.5_0000016g0110.1
MSTRG.14667.6	Nitab4.5_0000016g0120.1
MSTRG.14667.7	Nitab4.5_0000016g0130.1
MSTRG.14667.8	Nitab4.5_0000016g0140.1
MSTRG.14676.1	Nitab4.5_0000016g0150.1
MSTRG.14676.2	Nitab4.5_0000016g0160.1
MSTRG.14697.6	Nitab4.5_0000016g0170.1
MSTRG.14697.7	Nitab4.5_0000016g0180.1
MSTRG.14698.1	Nitab4.5_0000016g0190.1
MSTRG.14700.2	Nitab4.5_0000016g0200.1
MSTRG.14704.1	Nitab4.5_0000016g0210.1
MSTRG.14706.6	Nitab4.5_0000016g0220.1
MSTRG.1472.3	Nitab4.5_0000016g0230.1
MSTRG.14721.1	Nitab4.5_0000016g0240.1
MSTRG.1473.1	Nitab4.5_0000016g0250.1
MSTRG.1474.1	Nitab4.5_0000016g0260.1
MSTRG.1474.2	Nitab4.5_0000016g0270.1
MSTRG.1475.1	Nitab4.5_0000016g0280.1
MSTRG.14788.1	Nitab4.5_0000016g0290.1
MSTRG.14797.1	Nitab4.5_0000016g0300.1
MSTRG.14806.1	Nitab4.5_0000016g0310.1
MSTRG.14809.1	Nitab4.5_0000016g0320.1
MSTRG.14809.2	Nitab4.5_0000016g0330.1
MSTRG.14815.1	Nitab4.5_0000016g0340.1
MSTRG.14815.2	Nitab4.5_0000016g0350.1
MSTRG.14815.3	Nitab4.5_0000016g0360.1
MSTRG.14818.1	Nitab4.5_0000016g0370.1
MSTRG.14819.1	Nitab4.5_0000016g0380.1
MSTRG.14826.1	Nitab4.5_0000016g0390.1
MSTRG.14831.1	Nitab4.5_0000016g0400.1
MSTRG.14834.1	Nitab4.5_0000016g0410.1
MSTRG.14835.1	Nitab4.5_0000016g0420.1
MSTRG.14860.1	Nitab4.5_0000016g0430.1
MSTRG.14877.1	Nitab4.5_0000016g0440.1
MSTRG.1488.1	Nitab4.5_0000016g0450.1
MSTRG.14886.1	Nitab4.5_0000016g0460.1
MSTRG.14886.2	Nitab4.5_0000016g0470.1
MSTRG.14902.1	Nitab4.5_0000016g0480.1
MSTRG.14905.1	Nitab4.5_0000016g0490.1
MSTRG.14925.1	Nitab4.5_0000016g0500.1
MSTRG.14926.2	Nitab4.5_0000016g0510.1
MSTRG.14930.1	Nitab4.5_0000016g0520.1
MSTRG.14930.2	Nitab4.5_0000016g0530.1
MSTRG.14935.1	Nitab4.5_0000016g0540.1
MSTRG.14942.1	Nitab4.5_0000016g0550.1
MSTRG.14946.1	Nitab4.5_0000016g0560.1
MSTRG.14948.1	Nitab4.5_0000016g0570.1
MSTRG.1495.1	Nitab4.5_0000016g0580.1
MSTRG.14957.1	Nitab4.5_0000016g0590.1
MSTRG.14969.1	Nitab4.5_0000016g0600.1
MSTRG.14982.1	Nitab4.5_0000016g0610.1
MSTRG.14984.1	Nitab4.5_0000016g0620.1
MSTRG.14985.1	Nitab4.5_0000016g0630.1
MSTRG.14985.2	Nitab4.5_0000016g0640.1
MSTRG.14985.3	Nitab4.5_0000016g0650.1
MSTRG.14989.10	Nitab4.5_0000017g0010.1
MSTRG.14989.11	Nitab4.5_0000017g0020.1
MSTRG.14989.12	Nitab4.5_0000017g0030.1
MSTRG.14989.15	Nitab4.5_0000017g0040.1
MSTRG.14989.16	Nitab4.5_0000017g0050.1
MSTRG.14989.17	Nitab4.5_0000017g0060.1
MSTRG.14989.2	Nitab4.5_0000017g0070.1
MSTRG.14989.7	Nitab4.5_0000017g0080.1
MSTRG.14989.8	Nitab4.5_0000017g0090.1
MSTRG.14990.1	Nitab4.5_0000017g0100.1
MSTRG.14995.1	Nitab4.5_0000017g0110.1
MSTRG.14996.1	Nitab4.5_0000017g0120.1
MSTRG.14996.2	Nitab4.5_0000017g0130.1
MSTRG.15032.1	Nitab4.5_0000017g0140.1
MSTRG.15032.2	Nitab4.5_0000017g0150.1
MSTRG.15032.3	Nitab4.5_0000017g0160.1
MSTRG.15034.1	Nitab4.5_0000017g0170.1
MSTRG.15037.2	Nitab4.5_0000017g0180.1
MSTRG.15047.1	Nitab4.5_0000017g0190.1
MSTRG.15057.1	Nitab4.5_0000017g0200.1
MSTRG.15058.3	Nitab4.5_0000017g0210.1
MSTRG.15065.1	Nitab4.5_0000017g0220.1
MSTRG.15065.2	Nitab4.5_0000017g0230.1
MSTRG.15065.3	Nitab4.5_0000017g0240.1
MSTRG.15078.1	Nitab4.5_0000017g0250.1
MSTRG.15079.1	Nitab4.5_0000018g0010.1
MSTRG.15090.1	Nitab4.5_0000018g0020.1
MSTRG.15096.1	Nitab4.5_0000018g0030.1
MSTRG.15097.1	Nitab4.5_0000018g0040.1
MSTRG.1510.1	Nitab4.5_0000018g0050.1
MSTRG.15103.1	Nitab4.5_0000018g0060.1
MSTRG.15115.1	Nitab4.5_0000018g0070.1
MSTRG.15117.1	Nitab4.5_0000018g0080.1
MSTRG.15122.1	Nitab4.5_0000018g0090.1
MSTRG.15129.1	Nitab4.5_0000018g0100.1
MSTRG.15149.1	Nitab4.5_0000018g0110.1
MSTRG.15149.3	Nitab4.5_0000018g0120.1
MSTRG.15159.1	Nitab4.5_0000018g0130.1
MSTRG.15160.1	Nitab4.5_0000018g0140.1
MSTRG.15182.1	Nitab4.5_0000018g0150.1
MSTRG.15185.1	Nitab4.5_0000018g0160.1
MSTRG.15190.1	Nitab4.5_0000018g0170.1
MSTRG.15191.1	Nitab4.5_0000018g0180.1
MSTRG.15212.2	Nitab4.5_0000018g0190.1
MSTRG.15213.1	Nitab4.5_0000018g0200.1
MSTRG.15222.1	Nitab4.5_0000018g0210.1
MSTRG.15230.1	Nitab4.5_0000018g0220.1
MSTRG.15232.1	Nitab4.5_0000018g0230.1
MSTRG.15233.1	Nitab4.5_0000018g0240.1
MSTRG.1525.1	Nitab4.5_0000019g0010.1
MSTRG.15267.1	Nitab4.5_0000019g0020.1
MSTRG.15282.1	Nitab4.5_0000019g0030.1
MSTRG.15285.1	Nitab4.5_0000019g0040.1
MSTRG.15289.1	Nitab4.5_0000019g0050.1
MSTRG.1529.1	Nitab4.5_0000019g0060.1
MSTRG.1529.4	Nitab4.5_0000019g0070.1
MSTRG.1529.5	Nitab4.5_0000019g0080.1
MSTRG.15290.1	Nitab4.5_0000019g0090.1
MSTRG.15292.1	Nitab4.5_0000019g0100.1
MSTRG.15297.1	Nitab4.5_0000019g0110.1
MSTRG.15299.1	Nitab4.5_0000019g0120.1
MSTRG.15300.1	Nitab4.5_0000019g0130.1
MSTRG.15304.1	Nitab4.5_0000019g0140.1
MSTRG.15324.1	Nitab4.5_0000019g0150.1
MSTRG.15324.2	Nitab4.5_0000019g0160.1
MSTRG.1534.1	Nitab4.5_0000019g0170.1
MSTRG.1535.1	Nitab4.5_0000019g0180.1
MSTRG.15351.1	Nitab4.5_0000019g0190.1
MSTRG.15352.3	Nitab4.5_0000019g0200.1
MSTRG.15359.1	Nitab4.5_0000019g0210.1
MSTRG.15365.1	Nitab4.5_0000019g0220.1
MSTRG.15375.1	Nitab4.5_0000019g0230.1
MSTRG.15383.1	Nitab4.5_0000019g0240.1
MSTRG.15384.1	Nitab4.5_0000019g0250.1
MSTRG.15385.1	Nitab4.5_0000019g0260.1
MSTRG.15397.1	Nitab4.5_0000019g0270.1
MSTRG.15403.1	Nitab4.5_0000019g0280.1
MSTRG.15404.1	Nitab4.5_0000019g0290.1
MSTRG.15418.1	Nitab4.5_0000019g0300.1
MSTRG.15422.1	Nitab4.5_0000019g0310.1
MSTRG.15428.1	Nitab4.5_0000019g0320.1
MSTRG.15429.1	Nitab4.5_0000019g0330.1
MSTRG.15432.1	Nitab4.5_0000019g0340.1
MSTRG.15451.1	Nitab4.5_0000019g0350.1
MSTRG.15455.1	Nitab4.5_0000019g0360.1
MSTRG.15455.4	Nitab4.5_0000019g0370.1
MSTRG.15464.1	Nitab4.5_0000019g0380.1
MSTRG.15465.1	Nitab4.5_0000019g0390.1
MSTRG.15465.2	Nitab4.5_0000019g0400.1
MSTRG.15475.1	Nitab4.5_0000019g0410.1
MSTRG.15478.1	Nitab4.5_0000019g0420.1
MSTRG.15479.1	Nitab4.5_0000020g0010.1
MSTRG.1548.1	Nitab4.5_0000020g0020.1
MSTRG.15480.1	Nitab4.5_0000020g0030.1
MSTRG.15485.1	Nitab4.5_0000020g0040.1
MSTRG.1550.1	Nitab4.5_0000020g0050.1
MSTRG.15525.1	Nitab4.5_0000020g0060.1
MSTRG.15526.1	Nitab4.5_0000020g0070.1
MSTRG.15527.1	Nitab4.5_0000020g0080.1
MSTRG.15534.1	Nitab4.5_0000020g0090.1
MSTRG.15553.1	Nitab4.5_0000020g0100.1
MSTRG.15556.1	Nitab4.5_0000020g0110.1
MSTRG.15576.1	Nitab4.5_0000020g0120.1
MSTRG.15577.1	Nitab4.5_0000020g0130.1
MSTRG.15603.2	Nitab4.5_0000020g0140.1
MSTRG.15603.4	Nitab4.5_0000020g0150.1
MSTRG.15620.1	Nitab4.5_0000020g0160.1
MSTRG.15629.1	Nitab4.5_0000020g0170.1
MSTRG.15634.1	Nitab4.5_0000020g0180.1
MSTRG.15649.1	Nitab4.5_0000020g0190.1
MSTRG.15652.1	Nitab4.5_0000020g0200.1
MSTRG.15653.1	Nitab4.5_0000020g0210.1
MSTRG.15653.2	Nitab4.5_0000020g0220.1
MSTRG.15661.1	Nitab4.5_0000020g0230.1
MSTRG.15662.1	Nitab4.5_0000020g0240.1
MSTRG.15665.1	Nitab4.5_0000020g0250.1
MSTRG.15667.1	Nitab4.5_0000020g0260.1
MSTRG.15691.1	Nitab4.5_0000020g0270.1
MSTRG.15701.1	Nitab4.5_0000020g0280.1
MSTRG.15708.1	Nitab4.5_0000020g0290.1
MSTRG.15709.1	Nitab4.5_0000020g0300.1
MSTRG.15710.1	Nitab4.5_0000020g0310.1
MSTRG.15715.1	Nitab4.5_0000020g0320.1
MSTRG.15717.1	Nitab4.5_0000020g0330.1
MSTRG.1572.1	Nitab4.5_0000020g0340.1
MSTRG.15720.1	Nitab4.5_0000020g0350.1
MSTRG.15729.1	Nitab4.5_0000020g0360.1
MSTRG.15732.1	Nitab4.5_0000020g0370.1
MSTRG.1574.1	Nitab4.5_0000020g0380.1
MSTRG.15759.1	Nitab4.5_0000020g0390.1
MSTRG.1576.1	Nitab4.5_0000020g0400.1
MSTRG.15762.1	Nitab4.5_0000020g0410.1
MSTRG.15769.5	Nitab4.5_0000020g0420.1
MSTRG.15770.1	Nitab4.5_0000020g0430.1
MSTRG.15770.2	Nitab4.5_0000020g0440.1
MSTRG.15770.3	Nitab4.5_0000020g0450.1
MSTRG.15773.1	Nitab4.5_0000021g0010.1
MSTRG.15773.2	Nitab4.5_0000021g0020.1
MSTRG.1578.1	Nitab4.5_0000021g0030.1
MSTRG.1579.1	Nitab4.5_0000021g0040.1
MSTRG.15795.1	Nitab4.5_0000021g0050.1
MSTRG.15796.1	Nitab4.5_0000021g0060.1
MSTRG.15799.1	Nitab4.5_0000021g0070.1
MSTRG.1581.1	Nitab4.5_0000021g0080.1
MSTRG.15854.1	Nitab4.5_0000021g0090.1
MSTRG.15855.1	Nitab4.5_0000021g0100.1
MSTRG.15870.1	Nitab4.5_0000021g0110.1
MSTRG.15872.1	Nitab4.5_0000021g0120.1
MSTRG.15885.2	Nitab4.5_0000021g0130.1
MSTRG.15894.1	Nitab4.5_0000021g0140.1
MSTRG.15900.1	Nitab4.5_0000021g0150.1
MSTRG.15903.1	Nitab4.5_0000021g0160.1
MSTRG.15911.1	Nitab4.5_0000021g0170.1
MSTRG.15916.1	Nitab4.5_0000021g0180.1
MSTRG.15918.1	Nitab4.5_0000021g0190.1
MSTRG.1592.1	Nitab4.5_0000021g0200.1
MSTRG.15920.1	Nitab4.5_0000021g0210.1
MSTRG.15921.1	Nitab4.5_0000021g0220.1
MSTRG.15921.2	Nitab4.5_0000021g0230.1
MSTRG.15921.3	Nitab4.5_0000021g0240.1
MSTRG.15927.1	Nitab4.5_0000021g0250.1
MSTRG.15931.1	Nitab4.5_0000021g0260.1
MSTRG.15931.2	Nitab4.5_0000021g0270.1
MSTRG.1594.1	Nitab4.5_0000021g0280.1
MSTRG.15952.2	Nitab4.5_0000021g0290.1
MSTRG.15969.1	Nitab4.5_0000021g0300.1
MSTRG.15980.1	Nitab4.5_0000021g0310.1
MSTRG.15994.1	Nitab4.5_0000021g0320.1
MSTRG.15999.1	Nitab4.5_0000021g0330.1
MSTRG.15999.2	Nitab4.5_0000021g0340.1
MSTRG.16002.1	Nitab4.5_0000021g0350.1
MSTRG.16004.1	Nitab4.5_0000021g0360.1
MSTRG.16005.1	Nitab4.5_0000021g0370.1
MSTRG.16006.1	Nitab4.5_0000021g0380.1
MSTRG.16010.1	Nitab4.5_0000021g0390.1
MSTRG.16015.1	Nitab4.5_0000021g0400.1
MSTRG.16036.1	Nitab4.5_0000021g0410.1
MSTRG.16048.1	Nitab4.5_0000021g0420.1
MSTRG.16055.1	Nitab4.5_0000021g0430.1
MSTRG.16056.1	Nitab4.5_0000021g0440.1
MSTRG.16068.1	Nitab4.5_0000021g0450.1
MSTRG.16084.1	Nitab4.5_0000021g0460.1
MSTRG.16085.1	Nitab4.5_0000021g0470.1
MSTRG.16085.2	Nitab4.5_0000021g0480.1
MSTRG.16085.3	Nitab4.5_0000021g0490.1
MSTRG.16087.1	Nitab4.5_0000021g0500.1
MSTRG.16088.1	Nitab4.5_0000021g0510.1
MSTRG.16090.1	Nitab4.5_0000021g0520.1
MSTRG.16091.1	Nitab4.5_0000021g0530.1
MSTRG.16094.1	Nitab4.5_0000021g0540.1
MSTRG.16095.1	Nitab4.5_0000021g0550.1
MSTRG.16096.1	Nitab4.5_0000021g0560.1
MSTRG.16114.2	Nitab4.5_0000021g0570.1
MSTRG.16127.1	Nitab4.5_0000021g0580.1
MSTRG.16127.2	Nitab4.5_0000021g0590.1
MSTRG.16128.1	Nitab4.5_0000021g0600.1
MSTRG.16154.1	Nitab4.5_0000021g0610.1
MSTRG.16156.1	Nitab4.5_0000021g0620.1
MSTRG.16165.1	Nitab4.5_0000021g0630.1
MSTRG.16184.1	Nitab4.5_0000021g0640.1
MSTRG.16184.2	Nitab4.5_0000021g0650.1
MSTRG.16185.1	Nitab4.5_0000021g0660.1
MSTRG.1620.2	Nitab4.5_0000021g0670.1
MSTRG.16210.9	Nitab4.5_0000021g0680.1
MSTRG.16220.1	Nitab4.5_0000021g0690.1
MSTRG.16220.2	Nitab4.5_0000021g0700.1
MSTRG.16234.1	Nitab4.5_0000021g0710.1
MSTRG.16234.2	Nitab4.5_0000021g0720.1
MSTRG.16238.1	Nitab4.5_0000021g0730.1
MSTRG.16250.1	Nitab4.5_0000021g0740.1
MSTRG.16259.1	Nitab4.5_0000021g0750.1
MSTRG.16266.1	Nitab4.5_0000021g0760.1
MSTRG.16266.2	Nitab4.5_0000021g0770.1
MSTRG.16272.1	Nitab4.5_0000021g0780.1
MSTRG.16281.1	Nitab4.5_0000021g0790.1
MSTRG.16288.1	Nitab4.5_0000021g0800.1
MSTRG.16293.1	Nitab4.5_0000021g0810.1
MSTRG.16293.2	Nitab4.5_0000021g0820.1
MSTRG.163.1	Nitab4.5_0000021g0830.1
MSTRG.16339.1	Nitab4.5_0000021g0840.1
MSTRG.16352.1	Nitab4.5_0000021g0850.1
MSTRG.16363.1	Nitab4.5_0000021g0860.1
MSTRG.16385.1	Nitab4.5_0000021g0870.1
MSTRG.16385.2	Nitab4.5_0000021g0880.1
MSTRG.16386.1	Nitab4.5_0000021g0890.1
MSTRG.16386.2	Nitab4.5_0000021g0900.1
MSTRG.16387.1	Nitab4.5_0000021g0910.1
MSTRG.16388.1	Nitab4.5_0000021g0920.1
MSTRG.16395.1	Nitab4.5_0000021g0930.1
MSTRG.16443.1	Nitab4.5_0000021g0940.1
MSTRG.16444.1	Nitab4.5_0000021g0950.1
MSTRG.16444.2	Nitab4.5_0000021g0960.1
MSTRG.16455.1	Nitab4.5_0000021g0970.1
MSTRG.16465.1	Nitab4.5_0000021g0980.1
MSTRG.16471.1	Nitab4.5_0000021g0990.1
MSTRG.16476.1	Nitab4.5_0000021g1000.1
MSTRG.16490.1	Nitab4.5_0000021g1010.1
MSTRG.16490.2	Nitab4.5_0000021g1020.1
MSTRG.16492.1	Nitab4.5_0000021g1030.1
MSTRG.16533.1	Nitab4.5_0000021g1040.1
MSTRG.16534.1	Nitab4.5_0000021g1050.1
MSTRG.16545.1	Nitab4.5_0000021g1060.1
MSTRG.16560.1	Nitab4.5_0000021g1070.1
MSTRG.1657.4	Nitab4.5_0000022g0010.1
MSTRG.16578.23	Nitab4.5_0000022g0020.1
MSTRG.16584.1	Nitab4.5_0000022g0030.1
MSTRG.16596.1	Nitab4.5_0000022g0040.1
MSTRG.16599.1	Nitab4.5_0000022g0050.1
MSTRG.16607.1	Nitab4.5_0000022g0060.1
MSTRG.16612.1	Nitab4.5_0000022g0070.1
MSTRG.16612.2	Nitab4.5_0000022g0080.1
MSTRG.16613.1	Nitab4.5_0000022g0090.1
MSTRG.16616.1	Nitab4.5_0000022g0100.1
MSTRG.16617.1	Nitab4.5_0000022g0110.1
MSTRG.16618.1	Nitab4.5_0000022g0120.1
MSTRG.1662.1	Nitab4.5_0000022g0130.1
MSTRG.16634.1	Nitab4.5_0000022g0140.1
MSTRG.16635.1	Nitab4.5_0000022g0150.1
MSTRG.16648.1	Nitab4.5_0000022g0160.1
MSTRG.16655.1	Nitab4.5_0000022g0170.1
MSTRG.16658.6	Nitab4.5_0000022g0180.1
MSTRG.16660.1	Nitab4.5_0000022g0190.1
MSTRG.16661.1	Nitab4.5_0000022g0200.1
MSTRG.16666.1	Nitab4.5_0000022g0210.1
MSTRG.16673.1	Nitab4.5_0000022g0220.1
MSTRG.16673.2	Nitab4.5_0000022g0230.1
MSTRG.16674.1	Nitab4.5_0000022g0240.1
MSTRG.16679.1	Nitab4.5_0000022g0250.1
MSTRG.16680.1	Nitab4.5_0000022g0260.1
MSTRG.16681.1	Nitab4.5_0000022g0270.1
MSTRG.16681.2	Nitab4.5_0000022g0280.1
MSTRG.16681.3	Nitab4.5_0000022g0290.1
MSTRG.16683.1	Nitab4.5_0000022g0300.1
MSTRG.16690.1	Nitab4.5_0000022g0310.1
MSTRG.16693.5	Nitab4.5_0000022g0320.1
MSTRG.16695.1	Nitab4.5_0000022g0330.1
MSTRG.16719.1	Nitab4.5_0000022g0340.1
MSTRG.16745.1	Nitab4.5_0000022g0350.1
MSTRG.16746.1	Nitab4.5_0000022g0360.1
MSTRG.16749.1	Nitab4.5_0000022g0370.1
MSTRG.16763.1	Nitab4.5_0000022g0380.1
MSTRG.16773.1	Nitab4.5_0000022g0390.1
MSTRG.16778.1	Nitab4.5_0000022g0400.1
MSTRG.16784.1	Nitab4.5_0000022g0410.1
MSTRG.16794.1	Nitab4.5_0000022g0420.1
MSTRG.16800.1	Nitab4.5_0000022g0430.1
MSTRG.16819.1	Nitab4.5_0000022g0440.1
MSTRG.16821.1	Nitab4.5_0000022g0450.1
MSTRG.16821.2	Nitab4.5_0000023g0010.1
MSTRG.16826.1	Nitab4.5_0000023g0020.1
MSTRG.16830.1	Nitab4.5_0000023g0030.1
MSTRG.16835.1	Nitab4.5_0000023g0040.1
MSTRG.16836.1	Nitab4.5_0000023g0050.1
MSTRG.16847.1	Nitab4.5_0000023g0060.1
MSTRG.16849.1	Nitab4.5_0000023g0070.1
MSTRG.16850.1	Nitab4.5_0000023g0080.1
MSTRG.16850.2	Nitab4.5_0000023g0090.1
MSTRG.16852.1	Nitab4.5_0000023g0100.1
MSTRG.16855.1	Nitab4.5_0000023g0110.1
MSTRG.16856.1	Nitab4.5_0000023g0120.1
MSTRG.16856.2	Nitab4.5_0000023g0130.1
MSTRG.16856.3	Nitab4.5_0000023g0140.1
MSTRG.16857.1	Nitab4.5_0000023g0150.1
MSTRG.16857.2	Nitab4.5_0000023g0160.1
MSTRG.16857.3	Nitab4.5_0000023g0170.1
MSTRG.16857.4	Nitab4.5_0000023g0180.1
MSTRG.16860.1	Nitab4.5_0000023g0190.1
MSTRG.16888.1	Nitab4.5_0000023g0200.1
MSTRG.16888.2	Nitab4.5_0000023g0210.1
MSTRG.16888.3	Nitab4.5_0000023g0220.1
MSTRG.16900.1	Nitab4.5_0000023g0230.1
MSTRG.16901.1	Nitab4.5_0000023g0240.1
MSTRG.16902.1	Nitab4.5_0000023g0250.1
MSTRG.16902.2	Nitab4.5_0000023g0260.1
MSTRG.16903.1	Nitab4.5_0000023g0270.1
MSTRG.16904.1	Nitab4.5_0000023g0280.1
MSTRG.16912.1	Nitab4.5_0000023g0290.1
MSTRG.16921.1	Nitab4.5_0000023g0300.1
MSTRG.16926.2	Nitab4.5_0000023g0310.1
MSTRG.16930.1	Nitab4.5_0000023g0320.1
MSTRG.16932.1	Nitab4.5_0000023g0330.1
MSTRG.16933.1	Nitab4.5_0000023g0340.1
MSTRG.16936.1	Nitab4.5_0000023g0350.1
MSTRG.16937.2	Nitab4.5_0000023g0360.1
MSTRG.16938.1	Nitab4.5_0000023g0370.1
MSTRG.16940.1	Nitab4.5_0000023g0380.1
MSTRG.16942.1	Nitab4.5_0000023g0390.1
MSTRG.16949.1	Nitab4.5_0000023g0400.1
MSTRG.1695.1	Nitab4.5_0000023g0410.1
MSTRG.16952.1	Nitab4.5_0000023g0420.1
MSTRG.16955.1	Nitab4.5_0000023g0430.1
MSTRG.16969.1	Nitab4.5_0000023g0440.1
MSTRG.16973.1	Nitab4.5_0000023g0450.1
MSTRG.16973.2	Nitab4.5_0000023g0460.1
MSTRG.16975.1	Nitab4.5_0000023g0470.1
MSTRG.16989.1	Nitab4.5_0000023g0480.1
MSTRG.16990.1	Nitab4.5_0000023g0490.1
MSTRG.16990.2	Nitab4.5_0000023g0500.1
MSTRG.16990.3	Nitab4.5_0000023g0510.1
MSTRG.16990.4	Nitab4.5_0000023g0520.1
MSTRG.16991.1	Nitab4.5_0000023g0530.1
MSTRG.16994.1	Nitab4.5_0000023g0540.1
MSTRG.17.1	Nitab4.5_0000023g0550.1
MSTRG.17003.1	Nitab4.5_0000023g0560.1
MSTRG.17035.1	Nitab4.5_0000023g0570.1
MSTRG.17036.1	Nitab4.5_0000023g0580.1
MSTRG.17036.2	Nitab4.5_0000023g0590.1
MSTRG.17038.1	Nitab4.5_0000023g0600.1
MSTRG.17038.2	Nitab4.5_0000023g0610.1
MSTRG.17038.3	Nitab4.5_0000023g0620.1
MSTRG.17039.1	Nitab4.5_0000023g0630.1
MSTRG.17040.1	Nitab4.5_0000023g0640.1
MSTRG.17053.1	Nitab4.5_0000023g0650.1
MSTRG.17054.1	Nitab4.5_0000023g0660.1
MSTRG.17066.1	Nitab4.5_0000023g0670.1
MSTRG.17067.7	Nitab4.5_0000023g0680.1
MSTRG.17067.9	Nitab4.5_0000023g0690.1
MSTRG.17085.1	Nitab4.5_0000023g0700.1
MSTRG.17086.1	Nitab4.5_0000023g0710.1
MSTRG.17094.1	Nitab4.5_0000023g0720.1
MSTRG.17099.1	Nitab4.5_0000023g0730.1
MSTRG.17118.4	Nitab4.5_0000023g0740.1
MSTRG.17118.7	Nitab4.5_0000023g0750.1
MSTRG.17118.8	Nitab4.5_0000023g0760.1
MSTRG.17122.1	Nitab4.5_0000024g0010.1
MSTRG.17127.3	Nitab4.5_0000024g0020.1
MSTRG.17142.1	Nitab4.5_0000024g0030.1
MSTRG.17146.1	Nitab4.5_0000024g0040.1
MSTRG.17152.2	Nitab4.5_0000024g0050.1
MSTRG.17153.1	Nitab4.5_0000024g0060.1
MSTRG.17153.2	Nitab4.5_0000024g0070.1
MSTRG.17153.3	Nitab4.5_0000024g0080.1
MSTRG.17156.1	Nitab4.5_0000024g0090.1
MSTRG.17163.1	Nitab4.5_0000024g0100.1
MSTRG.17163.2	Nitab4.5_0000024g0110.1
MSTRG.17163.3	Nitab4.5_0000024g0120.1
MSTRG.17175.3	Nitab4.5_0000024g0130.1
MSTRG.17192.1	Nitab4.5_0000024g0140.1
MSTRG.17198.1	Nitab4.5_0000024g0150.1
MSTRG.17214.1	Nitab4.5_0000024g0160.1
MSTRG.17214.2	Nitab4.5_0000024g0170.1
MSTRG.17219.1	Nitab4.5_0000024g0180.1
MSTRG.17219.2	Nitab4.5_0000024g0190.1
MSTRG.17222.1	Nitab4.5_0000024g0200.1
MSTRG.17226.1	Nitab4.5_0000024g0210.1
MSTRG.17229.1	Nitab4.5_0000024g0220.1
MSTRG.17230.1	Nitab4.5_0000024g0230.1
MSTRG.17231.1	Nitab4.5_0000024g0240.1
MSTRG.17231.2	Nitab4.5_0000024g0250.1
MSTRG.17232.1	Nitab4.5_0000024g0260.1
MSTRG.17234.1	Nitab4.5_0000024g0270.1
MSTRG.17237.1	Nitab4.5_0000024g0280.1
MSTRG.17241.1	Nitab4.5_0000024g0290.1
MSTRG.17242.1	Nitab4.5_0000024g0300.1
MSTRG.17254.1	Nitab4.5_0000024g0310.1
MSTRG.17256.1	Nitab4.5_0000025g0010.1
MSTRG.17261.1	Nitab4.5_0000025g0020.1
MSTRG.17261.2	Nitab4.5_0000025g0030.1
MSTRG.17263.1	Nitab4.5_0000025g0040.1
MSTRG.17271.1	Nitab4.5_0000025g0050.1
MSTRG.173.1	Nitab4.5_0000025g0060.1
MSTRG.17312.1	Nitab4.5_0000025g0070.1
MSTRG.17319.4	Nitab4.5_0000025g0080.1
MSTRG.17319.5	Nitab4.5_0000025g0090.1
MSTRG.17335.1	Nitab4.5_0000025g0100.1
MSTRG.17348.1	Nitab4.5_0000025g0110.1
MSTRG.17349.1	Nitab4.5_0000025g0120.1
MSTRG.17368.1	Nitab4.5_0000025g0130.1
MSTRG.17373.1	Nitab4.5_0000025g0140.1
MSTRG.17380.1	Nitab4.5_0000025g0150.1
MSTRG.1739.1	Nitab4.5_0000025g0160.1
MSTRG.17391.1	Nitab4.5_0000025g0170.1
MSTRG.17394.2	Nitab4.5_0000025g0180.1
MSTRG.17398.1	Nitab4.5_0000025g0190.1
MSTRG.174.1	Nitab4.5_0000025g0200.1
MSTRG.1740.1	Nitab4.5_0000025g0210.1
MSTRG.17404.1	Nitab4.5_0000025g0220.1
MSTRG.17408.1	Nitab4.5_0000025g0230.1
MSTRG.17409.1	Nitab4.5_0000025g0240.1
MSTRG.17442.1	Nitab4.5_0000025g0250.1
MSTRG.17442.2	Nitab4.5_0000025g0260.1
MSTRG.17459.1	Nitab4.5_0000025g0270.1
MSTRG.17461.1	Nitab4.5_0000025g0280.1
MSTRG.17468.1	Nitab4.5_0000025g0290.1
MSTRG.17477.1	Nitab4.5_0000025g0300.1
MSTRG.17479.1	Nitab4.5_0000025g0310.1
MSTRG.17480.1	Nitab4.5_0000025g0320.1
MSTRG.17481.1	Nitab4.5_0000025g0330.1
MSTRG.17486.1	Nitab4.5_0000025g0340.1
MSTRG.17487.3	Nitab4.5_0000025g0350.1
MSTRG.17488.1	Nitab4.5_0000025g0360.1
MSTRG.1749.1	Nitab4.5_0000025g0370.1
MSTRG.17495.1	Nitab4.5_0000025g0380.1
MSTRG.17516.1	Nitab4.5_0000025g0390.1
MSTRG.17520.1	Nitab4.5_0000025g0400.1
MSTRG.17521.1	Nitab4.5_0000025g0410.1
MSTRG.17526.1	Nitab4.5_0000025g0420.1
MSTRG.1756.1	Nitab4.5_0000025g0430.1
MSTRG.1758.1	Nitab4.5_0000025g0440.1
MSTRG.1758.2	Nitab4.5_0000025g0450.1
MSTRG.1758.3	Nitab4.5_0000025g0460.1
MSTRG.17601.1	Nitab4.5_0000025g0470.1
MSTRG.17603.1	Nitab4.5_0000025g0480.1
MSTRG.17615.5	Nitab4.5_0000025g0490.1
MSTRG.17618.3	Nitab4.5_0000025g0500.1
MSTRG.17647.1	Nitab4.5_0000025g0510.1
MSTRG.1765.1	Nitab4.5_0000025g0520.1
MSTRG.17654.1	Nitab4.5_0000025g0530.1
MSTRG.17656.1	Nitab4.5_0000025g0540.1
MSTRG.1767.1	Nitab4.5_0000025g0550.1
MSTRG.17674.1	Nitab4.5_0000025g0560.1
MSTRG.17679.1	Nitab4.5_0000025g0570.1
MSTRG.17679.2	Nitab4.5_0000025g0580.1
MSTRG.17701.1	Nitab4.5_0000025g0590.1
MSTRG.17702.1	Nitab4.5_0000025g0600.1
MSTRG.17703.1	Nitab4.5_0000025g0610.1
MSTRG.17712.1	Nitab4.5_0000025g0620.1
MSTRG.17720.1	Nitab4.5_0000025g0630.1
MSTRG.17722.1	Nitab4.5_0000025g0640.1
MSTRG.17729.1	Nitab4.5_0000026g0010.1
MSTRG.1773.1	Nitab4.5_0000026g0020.1
MSTRG.1773.2	Nitab4.5_0000026g0030.1
MSTRG.1773.4	Nitab4.5_0000026g0040.1
MSTRG.17730.1	Nitab4.5_0000026g0050.1
MSTRG.17731.1	Nitab4.5_0000026g0060.1
MSTRG.17735.2	Nitab4.5_0000026g0070.1
MSTRG.17750.1	Nitab4.5_0000026g0080.1
MSTRG.17752.1	Nitab4.5_0000026g0090.1
MSTRG.17757.1	Nitab4.5_0000026g0100.1
MSTRG.17764.1	Nitab4.5_0000026g0110.1
MSTRG.17765.4	Nitab4.5_0000026g0120.1
MSTRG.17770.1	Nitab4.5_0000026g0130.1
MSTRG.17772.1	Nitab4.5_0000026g0140.1
MSTRG.17774.1	Nitab4.5_0000026g0150.1
MSTRG.17776.1	Nitab4.5_0000026g0160.1
MSTRG.1778.1	Nitab4.5_0000026g0170.1
MSTRG.1780.1	Nitab4.5_0000026g0180.1
MSTRG.17814.1	Nitab4.5_0000026g0190.1
MSTRG.17819.1	Nitab4.5_0000026g0200.1
MSTRG.17823.1	Nitab4.5_0000026g0210.1
MSTRG.17823.2	Nitab4.5_0000026g0220.1
MSTRG.17826.1	Nitab4.5_0000026g0230.1
MSTRG.17859.1	Nitab4.5_0000026g0240.1
MSTRG.1787.1	Nitab4.5_0000026g0250.1
MSTRG.1787.2	Nitab4.5_0000026g0260.1
MSTRG.1788.1	Nitab4.5_0000026g0270.1
MSTRG.179.1	Nitab4.5_0000026g0280.1
MSTRG.1790.1	Nitab4.5_0000026g0290.1
MSTRG.17900.1	Nitab4.5_0000026g0300.1
MSTRG.17901.1	Nitab4.5_0000026g0310.1
MSTRG.17902.1	Nitab4.5_0000026g0320.1
MSTRG.17903.1	Nitab4.5_0000026g0330.1
MSTRG.17904.1	Nitab4.5_0000026g0340.1
MSTRG.17906.1	Nitab4.5_0000026g0350.1
MSTRG.17907.1	Nitab4.5_0000026g0360.1
MSTRG.17925.1	Nitab4.5_0000026g0370.1
MSTRG.17926.1	Nitab4.5_0000026g0380.1
MSTRG.17944.1	Nitab4.5_0000026g0390.1
MSTRG.17952.1	Nitab4.5_0000026g0400.1
MSTRG.17959.1	Nitab4.5_0000026g0410.1
MSTRG.17961.1	Nitab4.5_0000026g0420.1
MSTRG.17962.1	Nitab4.5_0000026g0430.1
MSTRG.17965.1	Nitab4.5_0000026g0440.1
MSTRG.17966.1	Nitab4.5_0000027g0010.1
MSTRG.17975.1	Nitab4.5_0000027g0020.1
MSTRG.17980.1	Nitab4.5_0000027g0030.1
MSTRG.17981.1	Nitab4.5_0000027g0040.1
MSTRG.17987.1	Nitab4.5_0000027g0050.1
MSTRG.17988.2	Nitab4.5_0000027g0060.1
MSTRG.17988.3	Nitab4.5_0000027g0070.1
MSTRG.17989.1	Nitab4.5_0000027g0080.1
MSTRG.17990.1	Nitab4.5_0000027g0090.1
MSTRG.17990.2	Nitab4.5_0000027g0100.1
MSTRG.17990.3	Nitab4.5_0000027g0110.1
MSTRG.17990.4	Nitab4.5_0000027g0120.1
MSTRG.17991.1	Nitab4.5_0000027g0130.1
MSTRG.17999.1	Nitab4.5_0000027g0140.1
MSTRG.1800.1	Nitab4.5_0000027g0150.1
MSTRG.18000.1	Nitab4.5_0000027g0160.1
MSTRG.18006.2	Nitab4.5_0000027g0170.1
MSTRG.1801.1	Nitab4.5_0000027g0180.1
MSTRG.18011.1	Nitab4.5_0000027g0190.1
MSTRG.18015.1	Nitab4.5_0000027g0200.1
MSTRG.18019.1	Nitab4.5_0000027g0210.1
MSTRG.1802.1	Nitab4.5_0000027g0220.1
MSTRG.18022.2	Nitab4.5_0000027g0230.1
MSTRG.18026.1	Nitab4.5_0000027g0240.1
MSTRG.18027.1	Nitab4.5_0000027g0250.1
MSTRG.18028.1	Nitab4.5_0000027g0260.1
MSTRG.18059.1	Nitab4.5_0000027g0270.1
MSTRG.18090.1	Nitab4.5_0000027g0280.1
MSTRG.18090.2	Nitab4.5_0000027g0290.1
MSTRG.18090.3	Nitab4.5_0000027g0300.1
MSTRG.18105.2	Nitab4.5_0000027g0310.1
MSTRG.18154.1	Nitab4.5_0000027g0320.1
MSTRG.18161.1	Nitab4.5_0000027g0330.1
MSTRG.18162.1	Nitab4.5_0000027g0340.1
MSTRG.18174.1	Nitab4.5_0000027g0350.1
MSTRG.18174.2	Nitab4.5_0000027g0360.1
MSTRG.18188.1	Nitab4.5_0000027g0370.1
MSTRG.18196.1	Nitab4.5_0000027g0380.1
MSTRG.18200.1	Nitab4.5_0000027g0390.1
MSTRG.18205.1	Nitab4.5_0000027g0400.1
MSTRG.18209.1	Nitab4.5_0000027g0410.1
MSTRG.18241.2	Nitab4.5_0000027g0420.1
MSTRG.18241.3	Nitab4.5_0000027g0430.1
MSTRG.18270.1	Nitab4.5_0000027g0440.1
MSTRG.18272.2	Nitab4.5_0000027g0450.1
MSTRG.1828.1	Nitab4.5_0000027g0460.1
MSTRG.18308.1	Nitab4.5_0000027g0470.1
MSTRG.18308.2	Nitab4.5_0000027g0480.1
MSTRG.18316.1	Nitab4.5_0000027g0490.1
MSTRG.18320.1	Nitab4.5_0000027g0500.1
MSTRG.18335.1	Nitab4.5_0000027g0510.1
MSTRG.18338.1	Nitab4.5_0000027g0520.1
MSTRG.18339.1	Nitab4.5_0000027g0530.1
MSTRG.18342.1	Nitab4.5_0000027g0540.1
MSTRG.18342.2	Nitab4.5_0000027g0550.1
MSTRG.18342.3	Nitab4.5_0000027g0560.1
MSTRG.18342.4	Nitab4.5_0000027g0570.1
MSTRG.18342.5	Nitab4.5_0000027g0580.1
MSTRG.18350.1	Nitab4.5_0000028g0010.1
MSTRG.18377.1	Nitab4.5_0000028g0020.1
MSTRG.18377.2	Nitab4.5_0000028g0030.1
MSTRG.18377.3	Nitab4.5_0000028g0040.1
MSTRG.18381.1	Nitab4.5_0000028g0050.1
MSTRG.18381.2	Nitab4.5_0000028g0060.1
MSTRG.18381.3	Nitab4.5_0000028g0070.1
MSTRG.18382.1	Nitab4.5_0000028g0080.1
MSTRG.18388.1	Nitab4.5_0000028g0090.1
MSTRG.18394.1	Nitab4.5_0000028g0100.1
MSTRG.18401.1	Nitab4.5_0000028g0110.1
MSTRG.18402.1	Nitab4.5_0000028g0120.1
MSTRG.18402.2	Nitab4.5_0000028g0130.1
MSTRG.18414.1	Nitab4.5_0000028g0140.1
MSTRG.18423.1	Nitab4.5_0000028g0150.1
MSTRG.18431.1	Nitab4.5_0000028g0160.1
MSTRG.18444.1	Nitab4.5_0000028g0170.1
MSTRG.18455.1	Nitab4.5_0000028g0180.1
MSTRG.18458.1	Nitab4.5_0000028g0190.1
MSTRG.18459.1	Nitab4.5_0000028g0200.1
MSTRG.18460.1	Nitab4.5_0000028g0210.1
MSTRG.18467.1	Nitab4.5_0000028g0220.1
MSTRG.18468.1	Nitab4.5_0000028g0230.1
MSTRG.18474.1	Nitab4.5_0000028g0240.1
MSTRG.18480.1	Nitab4.5_0000028g0250.1
MSTRG.18486.1	Nitab4.5_0000028g0260.1
MSTRG.18492.1	Nitab4.5_0000028g0270.1
MSTRG.18498.1	Nitab4.5_0000028g0280.1
MSTRG.18499.1	Nitab4.5_0000028g0290.1
MSTRG.185.1	Nitab4.5_0000028g0300.1
MSTRG.18501.1	Nitab4.5_0000028g0310.1
MSTRG.18502.1	Nitab4.5_0000028g0320.1
MSTRG.18503.1	Nitab4.5_0000028g0330.1
MSTRG.18512.1	Nitab4.5_0000028g0340.1
MSTRG.18522.1	Nitab4.5_0000028g0350.1
MSTRG.18525.1	Nitab4.5_0000028g0360.1
MSTRG.18526.1	Nitab4.5_0000028g0370.1
MSTRG.18526.2	Nitab4.5_0000028g0380.1
MSTRG.18527.1	Nitab4.5_0000028g0390.1
MSTRG.18528.1	Nitab4.5_0000028g0400.1
MSTRG.18536.1	Nitab4.5_0000028g0410.1
MSTRG.18542.1	Nitab4.5_0000028g0420.1
MSTRG.18545.1	Nitab4.5_0000028g0430.1
MSTRG.18566.1	Nitab4.5_0000028g0440.1
MSTRG.1858.1	Nitab4.5_0000028g0450.1
MSTRG.18584.1	Nitab4.5_0000028g0460.1
MSTRG.18590.1	Nitab4.5_0000028g0470.1
MSTRG.18593.1	Nitab4.5_0000028g0480.1
MSTRG.186.1	Nitab4.5_0000029g0010.1
MSTRG.18605.1	Nitab4.5_0000029g0020.1
MSTRG.18605.2	Nitab4.5_0000029g0030.1
MSTRG.18605.3	Nitab4.5_0000029g0040.1
MSTRG.18605.4	Nitab4.5_0000029g0050.1
MSTRG.18610.1	Nitab4.5_0000029g0060.1
MSTRG.18634.1	Nitab4.5_0000029g0070.1
MSTRG.18634.2	Nitab4.5_0000029g0080.1
MSTRG.18635.1	Nitab4.5_0000029g0090.1
MSTRG.18639.1	Nitab4.5_0000029g0100.1
MSTRG.18645.1	Nitab4.5_0000029g0110.1
MSTRG.18646.1	Nitab4.5_0000029g0120.1
MSTRG.18654.1	Nitab4.5_0000029g0130.1
MSTRG.18654.2	Nitab4.5_0000029g0140.1
MSTRG.18657.1	Nitab4.5_0000029g0150.1
MSTRG.18661.1	Nitab4.5_0000029g0160.1
MSTRG.18662.1	Nitab4.5_0000029g0170.1
MSTRG.18663.1	Nitab4.5_0000029g0180.1
MSTRG.18667.1	Nitab4.5_0000029g0190.1
MSTRG.18668.1	Nitab4.5_0000029g0200.1
MSTRG.18669.1	Nitab4.5_0000029g0210.1
MSTRG.18672.1	Nitab4.5_0000029g0220.1
MSTRG.18673.1	Nitab4.5_0000029g0230.1
MSTRG.18674.1	Nitab4.5_0000029g0240.1
MSTRG.18697.3	Nitab4.5_0000029g0250.1
MSTRG.18697.5	Nitab4.5_0000029g0260.1
MSTRG.18697.7	Nitab4.5_0000029g0270.1
MSTRG.18698.1	Nitab4.5_0000029g0280.1
MSTRG.18703.1	Nitab4.5_0000029g0290.1
MSTRG.18705.1	Nitab4.5_0000029g0300.1
MSTRG.18705.2	Nitab4.5_0000029g0310.1
MSTRG.18706.1	Nitab4.5_0000029g0320.1
MSTRG.18709.1	Nitab4.5_0000029g0330.1
MSTRG.18710.1	Nitab4.5_0000029g0340.1
MSTRG.18717.1	Nitab4.5_0000030g0010.1
MSTRG.18734.1	Nitab4.5_0000030g0020.1
MSTRG.18734.2	Nitab4.5_0000030g0030.1
MSTRG.18734.4	Nitab4.5_0000030g0040.1
MSTRG.18738.1	Nitab4.5_0000030g0050.1
MSTRG.18739.1	Nitab4.5_0000030g0060.1
MSTRG.18740.1	Nitab4.5_0000030g0070.1
MSTRG.18742.1	Nitab4.5_0000030g0080.1
MSTRG.18749.1	Nitab4.5_0000030g0090.1
MSTRG.18750.1	Nitab4.5_0000030g0100.1
MSTRG.18751.1	Nitab4.5_0000030g0110.1
MSTRG.18757.1	Nitab4.5_0000030g0120.1
MSTRG.18758.1	Nitab4.5_0000030g0130.1
MSTRG.18759.1	Nitab4.5_0000030g0140.1
MSTRG.18761.1	Nitab4.5_0000030g0150.1
MSTRG.18762.1	Nitab4.5_0000030g0160.1
MSTRG.18763.1	Nitab4.5_0000030g0170.1
MSTRG.18768.1	Nitab4.5_0000030g0180.1
MSTRG.18768.2	Nitab4.5_0000030g0190.1
MSTRG.18779.4	Nitab4.5_0000030g0200.1
MSTRG.18803.1	Nitab4.5_0000030g0210.1
MSTRG.18806.1	Nitab4.5_0000030g0220.1
MSTRG.18811.1	Nitab4.5_0000030g0230.1
MSTRG.18816.1	Nitab4.5_0000030g0240.1
MSTRG.18817.1	Nitab4.5_0000030g0250.1
MSTRG.18842.2	Nitab4.5_0000030g0260.1
MSTRG.18845.1	Nitab4.5_0000030g0270.1
MSTRG.18856.1	Nitab4.5_0000030g0280.1
MSTRG.18865.1	Nitab4.5_0000030g0290.1
MSTRG.18875.1	Nitab4.5_0000030g0300.1
MSTRG.18893.2	Nitab4.5_0000030g0310.1
MSTRG.18894.1	Nitab4.5_0000030g0320.1
MSTRG.189.1	Nitab4.5_0000030g0330.1
MSTRG.18919.1	Nitab4.5_0000030g0340.1
MSTRG.1892.1	Nitab4.5_0000030g0350.1
MSTRG.18924.1	Nitab4.5_0000030g0360.1
MSTRG.18925.1	Nitab4.5_0000030g0370.1
MSTRG.18931.4	Nitab4.5_0000030g0380.1
MSTRG.18931.5	Nitab4.5_0000030g0390.1
MSTRG.18931.6	Nitab4.5_0000030g0400.1
MSTRG.18931.7	Nitab4.5_0000030g0410.1
MSTRG.18941.1	Nitab4.5_0000030g0420.1
MSTRG.18942.1	Nitab4.5_0000030g0430.1
MSTRG.18944.1	Nitab4.5_0000030g0440.1
MSTRG.18945.1	Nitab4.5_0000030g0450.1
MSTRG.18946.1	Nitab4.5_0000030g0460.1
MSTRG.18946.2	Nitab4.5_0000030g0470.1
MSTRG.18946.3	Nitab4.5_0000030g0480.1
MSTRG.18946.5	Nitab4.5_0000030g0490.1
MSTRG.18946.6	Nitab4.5_0000030g0500.1
MSTRG.18946.7	Nitab4.5_0000030g0510.1
MSTRG.18946.8	Nitab4.5_0000030g0520.1
MSTRG.18951.1	Nitab4.5_0000030g0530.1
MSTRG.18953.1	Nitab4.5_0000030g0540.1
MSTRG.18955.1	Nitab4.5_0000030g0550.1
MSTRG.18957.1	Nitab4.5_0000030g0560.1
MSTRG.18961.1	Nitab4.5_0000030g0570.1
MSTRG.18990.1	Nitab4.5_0000030g0580.1
MSTRG.18991.1	Nitab4.5_0000030g0590.1
MSTRG.18993.1	Nitab4.5_0000030g0600.1
MSTRG.18994.1	Nitab4.5_0000030g0610.1
MSTRG.18995.1	Nitab4.5_0000030g0620.1
MSTRG.18995.2	Nitab4.5_0000031g0010.1
MSTRG.19003.1	Nitab4.5_0000031g0020.1
MSTRG.19003.2	Nitab4.5_0000031g0030.1
MSTRG.19006.1	Nitab4.5_0000031g0040.1
MSTRG.19007.1	Nitab4.5_0000031g0050.1
MSTRG.1901.1	Nitab4.5_0000031g0060.1
MSTRG.1901.2	Nitab4.5_0000031g0070.1
MSTRG.1901.3	Nitab4.5_0000031g0080.1
MSTRG.19053.1	Nitab4.5_0000031g0090.1
MSTRG.19054.1	Nitab4.5_0000031g0100.1
MSTRG.19055.1	Nitab4.5_0000031g0110.1
MSTRG.19056.1	Nitab4.5_0000031g0120.1
MSTRG.19057.1	Nitab4.5_0000031g0130.1
MSTRG.19062.1	Nitab4.5_0000031g0140.1
MSTRG.19063.1	Nitab4.5_0000031g0150.1
MSTRG.19064.1	Nitab4.5_0000031g0160.1
MSTRG.19068.1	Nitab4.5_0000031g0170.1
MSTRG.19069.1	Nitab4.5_0000031g0180.1
MSTRG.19069.2	Nitab4.5_0000031g0190.1
MSTRG.19072.1	Nitab4.5_0000031g0200.1
MSTRG.19074.1	Nitab4.5_0000031g0210.1
MSTRG.19077.1	Nitab4.5_0000031g0220.1
MSTRG.19079.1	Nitab4.5_0000031g0230.1
MSTRG.19079.2	Nitab4.5_0000031g0240.1
MSTRG.1908.2	Nitab4.5_0000031g0250.1
MSTRG.1908.3	Nitab4.5_0000031g0260.1
MSTRG.1908.4	Nitab4.5_0000031g0270.1
MSTRG.19080.1	Nitab4.5_0000031g0280.1
MSTRG.191.1	Nitab4.5_0000031g0290.1
MSTRG.19107.1	Nitab4.5_0000031g0300.1
MSTRG.19124.1	Nitab4.5_0000031g0310.1
MSTRG.19141.2	Nitab4.5_0000031g0320.1
MSTRG.19143.1	Nitab4.5_0000031g0330.1
MSTRG.19143.2	Nitab4.5_0000031g0340.1
MSTRG.19151.1	Nitab4.5_0000031g0350.1
MSTRG.19151.2	Nitab4.5_0000031g0360.1
MSTRG.19151.3	Nitab4.5_0000031g0370.1
MSTRG.19151.4	Nitab4.5_0000031g0380.1
MSTRG.19151.5	Nitab4.5_0000031g0390.1
MSTRG.19157.1	Nitab4.5_0000031g0400.1
MSTRG.19161.1	Nitab4.5_0000031g0410.1
MSTRG.19161.2	Nitab4.5_0000031g0420.1
MSTRG.19169.1	Nitab4.5_0000031g0430.1
MSTRG.19170.1	Nitab4.5_0000031g0440.1
MSTRG.19170.2	Nitab4.5_0000031g0450.1
MSTRG.19175.1	Nitab4.5_0000031g0460.1
MSTRG.19178.1	Nitab4.5_0000031g0470.1
MSTRG.19178.3	Nitab4.5_0000031g0480.1
MSTRG.19178.4	Nitab4.5_0000031g0490.1
MSTRG.19179.1	Nitab4.5_0000031g0500.1
MSTRG.19180.1	Nitab4.5_0000031g0510.1
MSTRG.19183.1	Nitab4.5_0000031g0520.1
MSTRG.19188.1	Nitab4.5_0000031g0530.1
MSTRG.19191.1	Nitab4.5_0000031g0540.1
MSTRG.19201.1	Nitab4.5_0000032g0010.1
MSTRG.19202.1	Nitab4.5_0000032g0020.1
MSTRG.19219.1	Nitab4.5_0000032g0030.1
MSTRG.19224.1	Nitab4.5_0000032g0040.1
MSTRG.19227.1	Nitab4.5_0000032g0050.1
MSTRG.19230.1	Nitab4.5_0000032g0060.1
MSTRG.19243.1	Nitab4.5_0000032g0070.1
MSTRG.19243.2	Nitab4.5_0000032g0080.1
MSTRG.19243.3	Nitab4.5_0000032g0090.1
MSTRG.19245.3	Nitab4.5_0000032g0100.1
MSTRG.19247.1	Nitab4.5_0000032g0110.1
MSTRG.19250.1	Nitab4.5_0000032g0120.1
MSTRG.19252.1	Nitab4.5_0000032g0130.1
MSTRG.19254.1	Nitab4.5_0000032g0140.1
MSTRG.19256.1	Nitab4.5_0000032g0150.1
MSTRG.19271.1	Nitab4.5_0000032g0160.1
MSTRG.19271.2	Nitab4.5_0000032g0170.1
MSTRG.19273.1	Nitab4.5_0000032g0180.1
MSTRG.19275.1	Nitab4.5_0000032g0190.1
MSTRG.1928.1	Nitab4.5_0000032g0200.1
MSTRG.19281.1	Nitab4.5_0000032g0210.1
MSTRG.19288.1	Nitab4.5_0000032g0220.1
MSTRG.19294.1	Nitab4.5_0000032g0230.1
MSTRG.19294.2	Nitab4.5_0000032g0240.1
MSTRG.19294.3	Nitab4.5_0000032g0250.1
MSTRG.19303.1	Nitab4.5_0000032g0260.1
MSTRG.19336.1	Nitab4.5_0000032g0270.1
MSTRG.19344.1	Nitab4.5_0000032g0280.1
MSTRG.1935.1	Nitab4.5_0000032g0290.1
MSTRG.19350.1	Nitab4.5_0000032g0300.1
MSTRG.19356.1	Nitab4.5_0000032g0310.1
MSTRG.19368.1	Nitab4.5_0000032g0320.1
MSTRG.19388.1	Nitab4.5_0000032g0330.1
MSTRG.19389.1	Nitab4.5_0000032g0340.1
MSTRG.19390.1	Nitab4.5_0000032g0350.1
MSTRG.19395.1	Nitab4.5_0000032g0360.1
MSTRG.19396.1	Nitab4.5_0000032g0370.1
MSTRG.1940.1	Nitab4.5_0000032g0380.1
MSTRG.19401.1	Nitab4.5_0000032g0390.1
MSTRG.19401.2	Nitab4.5_0000032g0400.1
MSTRG.19403.1	Nitab4.5_0000032g0410.1
MSTRG.19426.1	Nitab4.5_0000032g0420.1
MSTRG.19444.1	Nitab4.5_0000032g0430.1
MSTRG.19451.1	Nitab4.5_0000032g0440.1
MSTRG.19457.1	Nitab4.5_0000032g0450.1
MSTRG.1946.1	Nitab4.5_0000032g0460.1
MSTRG.19462.1	Nitab4.5_0000032g0470.1
MSTRG.19471.1	Nitab4.5_0000032g0480.1
MSTRG.19471.2	Nitab4.5_0000032g0490.1
MSTRG.19472.1	Nitab4.5_0000032g0500.1
MSTRG.19474.1	Nitab4.5_0000032g0510.1
MSTRG.19490.1	Nitab4.5_0000032g0520.1
MSTRG.19491.1	Nitab4.5_0000032g0530.1
MSTRG.19495.1	Nitab4.5_0000033g0010.1
MSTRG.19501.1	Nitab4.5_0000033g0020.1
MSTRG.19517.1	Nitab4.5_0000033g0030.1
MSTRG.19517.2	Nitab4.5_0000033g0040.1
MSTRG.19517.3	Nitab4.5_0000033g0050.1
MSTRG.19517.4	Nitab4.5_0000033g0060.1
MSTRG.19517.5	Nitab4.5_0000033g0070.1
MSTRG.19517.6	Nitab4.5_0000033g0080.1
MSTRG.19520.1	Nitab4.5_0000033g0090.1
MSTRG.19520.2	Nitab4.5_0000033g0100.1
MSTRG.19520.3	Nitab4.5_0000033g0110.1
MSTRG.19520.4	Nitab4.5_0000033g0120.1
MSTRG.19523.1	Nitab4.5_0000033g0130.1
MSTRG.19527.1	Nitab4.5_0000033g0140.1
MSTRG.19527.2	Nitab4.5_0000033g0150.1
MSTRG.19531.1	Nitab4.5_0000033g0160.1
MSTRG.1954.1	Nitab4.5_0000033g0170.1
MSTRG.1955.1	Nitab4.5_0000033g0180.1
MSTRG.19557.1	Nitab4.5_0000033g0190.1
MSTRG.19575.2	Nitab4.5_0000033g0200.1
MSTRG.19579.3	Nitab4.5_0000033g0210.1
MSTRG.19579.4	Nitab4.5_0000033g0220.1
MSTRG.19585.1	Nitab4.5_0000033g0230.1
MSTRG.19587.1	Nitab4.5_0000033g0240.1
MSTRG.19598.1	Nitab4.5_0000033g0250.1
MSTRG.196.1	Nitab4.5_0000033g0260.1
MSTRG.19613.1	Nitab4.5_0000033g0270.1
MSTRG.19616.1	Nitab4.5_0000033g0280.1
MSTRG.19619.1	Nitab4.5_0000033g0290.1
MSTRG.19624.1	Nitab4.5_0000033g0300.1
MSTRG.19625.1	Nitab4.5_0000033g0310.1
MSTRG.19627.1	Nitab4.5_0000033g0320.1
MSTRG.19634.1	Nitab4.5_0000033g0330.1
MSTRG.19643.1	Nitab4.5_0000033g0340.1
MSTRG.19643.2	Nitab4.5_0000033g0350.1
MSTRG.19643.3	Nitab4.5_0000033g0360.1
MSTRG.19643.4	Nitab4.5_0000033g0370.1
MSTRG.19643.5	Nitab4.5_0000033g0380.1
MSTRG.1965.3	Nitab4.5_0000033g0390.1
MSTRG.19665.1	Nitab4.5_0000033g0400.1
MSTRG.19666.1	Nitab4.5_0000033g0410.1
MSTRG.19674.1	Nitab4.5_0000033g0420.1
MSTRG.19687.1	Nitab4.5_0000033g0430.1
MSTRG.19692.1	Nitab4.5_0000033g0440.1
MSTRG.19701.1	Nitab4.5_0000033g0450.1
MSTRG.19704.3	Nitab4.5_0000033g0460.1
MSTRG.19708.1	Nitab4.5_0000034g0010.1
MSTRG.19711.1	Nitab4.5_0000034g0020.1
MSTRG.19723.1	Nitab4.5_0000034g0030.1
MSTRG.19724.2	Nitab4.5_0000034g0040.1
MSTRG.19724.3	Nitab4.5_0000034g0050.1
MSTRG.19727.1	Nitab4.5_0000034g0060.1
MSTRG.19727.2	Nitab4.5_0000034g0070.1
MSTRG.19732.1	Nitab4.5_0000034g0080.1
MSTRG.19743.1	Nitab4.5_0000034g0090.1
MSTRG.19747.1	Nitab4.5_0000034g0100.1
MSTRG.19748.1	Nitab4.5_0000034g0110.1
MSTRG.19755.1	Nitab4.5_0000034g0120.1
MSTRG.19761.1	Nitab4.5_0000034g0130.1
MSTRG.19761.2	Nitab4.5_0000034g0140.1
MSTRG.19761.3	Nitab4.5_0000034g0150.1
MSTRG.19769.1	Nitab4.5_0000034g0160.1
MSTRG.19771.1	Nitab4.5_0000034g0170.1
MSTRG.19774.1	Nitab4.5_0000034g0180.1
MSTRG.19786.1	Nitab4.5_0000034g0190.1
MSTRG.19791.1	Nitab4.5_0000034g0200.1
MSTRG.19805.1	Nitab4.5_0000034g0210.1
MSTRG.19819.2	Nitab4.5_0000034g0220.1
MSTRG.19844.2	Nitab4.5_0000034g0230.1
MSTRG.19845.1	Nitab4.5_0000034g0240.1
MSTRG.19847.1	Nitab4.5_0000034g0250.1
MSTRG.19848.1	Nitab4.5_0000034g0260.1
MSTRG.19849.1	Nitab4.5_0000034g0270.1
MSTRG.19849.2	Nitab4.5_0000034g0280.1
MSTRG.19849.3	Nitab4.5_0000034g0290.1
MSTRG.19863.1	Nitab4.5_0000035g0010.1
MSTRG.19875.1	Nitab4.5_0000035g0020.1
MSTRG.19886.1	Nitab4.5_0000035g0030.1
MSTRG.19886.3	Nitab4.5_0000035g0040.1
MSTRG.19886.4	Nitab4.5_0000035g0050.1
MSTRG.19893.1	Nitab4.5_0000035g0060.1
MSTRG.19900.1	Nitab4.5_0000035g0070.1
MSTRG.19904.1	Nitab4.5_0000035g0080.1
MSTRG.19910.1	Nitab4.5_0000035g0090.1
MSTRG.19923.1	Nitab4.5_0000035g0100.1
MSTRG.19927.1	Nitab4.5_0000035g0110.1
MSTRG.19928.1	Nitab4.5_0000035g0120.1
MSTRG.19933.1	Nitab4.5_0000035g0130.1
MSTRG.19933.2	Nitab4.5_0000035g0140.1
MSTRG.19933.4	Nitab4.5_0000035g0150.1
MSTRG.19933.5	Nitab4.5_0000035g0160.1
MSTRG.19934.2	Nitab4.5_0000035g0170.1
MSTRG.19934.3	Nitab4.5_0000035g0180.1
MSTRG.19934.4	Nitab4.5_0000035g0190.1
MSTRG.1995.1	Nitab4.5_0000035g0200.1
MSTRG.19952.1	Nitab4.5_0000035g0210.1
MSTRG.19956.1	Nitab4.5_0000035g0220.1
MSTRG.19966.1	Nitab4.5_0000035g0230.1
MSTRG.19994.1	Nitab4.5_0000035g0240.1
MSTRG.20019.1	Nitab4.5_0000035g0250.1
MSTRG.20019.3	Nitab4.5_0000035g0260.1
MSTRG.20022.1	Nitab4.5_0000035g0270.1
MSTRG.2003.1	Nitab4.5_0000035g0280.1
MSTRG.20038.1	Nitab4.5_0000035g0290.1
MSTRG.20068.1	Nitab4.5_0000035g0300.1
MSTRG.20069.1	Nitab4.5_0000035g0310.1
MSTRG.20071.1	Nitab4.5_0000035g0320.1
MSTRG.20079.1	Nitab4.5_0000035g0330.1
MSTRG.20080.1	Nitab4.5_0000035g0340.1
MSTRG.20083.1	Nitab4.5_0000035g0350.1
MSTRG.20089.1	Nitab4.5_0000035g0360.1
MSTRG.20089.2	Nitab4.5_0000035g0370.1
MSTRG.20093.1	Nitab4.5_0000035g0380.1
MSTRG.20095.1	Nitab4.5_0000035g0390.1
MSTRG.20096.1	Nitab4.5_0000035g0400.1
MSTRG.20097.1	Nitab4.5_0000036g0010.1
MSTRG.20099.1	Nitab4.5_0000036g0020.1
MSTRG.2010.1	Nitab4.5_0000036g0030.1
MSTRG.2010.2	Nitab4.5_0000036g0040.1
MSTRG.20108.1	Nitab4.5_0000036g0050.1
MSTRG.20114.1	Nitab4.5_0000036g0060.1
MSTRG.20116.1	Nitab4.5_0000036g0070.1
MSTRG.20116.2	Nitab4.5_0000036g0080.1
MSTRG.20116.3	Nitab4.5_0000036g0090.1
MSTRG.20120.1	Nitab4.5_0000036g0100.1
MSTRG.20122.1	Nitab4.5_0000036g0110.1
MSTRG.20134.1	Nitab4.5_0000036g0120.1
MSTRG.20141.1	Nitab4.5_0000036g0130.1
MSTRG.20149.1	Nitab4.5_0000036g0140.1
MSTRG.20151.1	Nitab4.5_0000036g0150.1
MSTRG.20169.1	Nitab4.5_0000036g0160.1
MSTRG.20172.1	Nitab4.5_0000036g0170.1
MSTRG.20174.1	Nitab4.5_0000036g0180.1
MSTRG.20191.1	Nitab4.5_0000036g0190.1
MSTRG.20206.1	Nitab4.5_0000036g0200.1
MSTRG.20232.1	Nitab4.5_0000036g0210.1
MSTRG.20233.1	Nitab4.5_0000036g0220.1
MSTRG.20236.1	Nitab4.5_0000036g0230.1
MSTRG.20254.1	Nitab4.5_0000036g0240.1
MSTRG.20257.1	Nitab4.5_0000036g0250.1
MSTRG.20257.2	Nitab4.5_0000036g0260.1
MSTRG.20257.3	Nitab4.5_0000036g0270.1
MSTRG.20257.4	Nitab4.5_0000036g0280.1
MSTRG.20257.5	Nitab4.5_0000036g0290.1
MSTRG.20268.1	Nitab4.5_0000036g0300.1
MSTRG.20268.3	Nitab4.5_0000036g0310.1
MSTRG.20268.4	Nitab4.5_0000036g0320.1
MSTRG.20268.6	Nitab4.5_0000036g0330.1
MSTRG.20273.1	Nitab4.5_0000036g0340.1
MSTRG.2028.1	Nitab4.5_0000036g0350.1
MSTRG.20286.1	Nitab4.5_0000036g0360.1
MSTRG.20292.1	Nitab4.5_0000036g0370.1
MSTRG.20292.3	Nitab4.5_0000036g0380.1
MSTRG.20300.2	Nitab4.5_0000036g0390.1
MSTRG.20300.3	Nitab4.5_0000036g0400.1
MSTRG.20301.1	Nitab4.5_0000036g0410.1
MSTRG.20302.1	Nitab4.5_0000036g0420.1
MSTRG.20310.1	Nitab4.5_0000036g0430.1
MSTRG.20313.1	Nitab4.5_0000036g0440.1
MSTRG.20338.1	Nitab4.5_0000036g0450.1
MSTRG.20339.1	Nitab4.5_0000036g0460.1
MSTRG.20344.1	Nitab4.5_0000036g0470.1
MSTRG.20345.1	Nitab4.5_0000036g0480.1
MSTRG.20346.1	Nitab4.5_0000036g0490.1
MSTRG.20347.1	Nitab4.5_0000036g0500.1
MSTRG.20359.1	Nitab4.5_0000036g0510.1
MSTRG.20362.1	Nitab4.5_0000036g0520.1
MSTRG.20363.1	Nitab4.5_0000036g0530.1
MSTRG.20363.2	Nitab4.5_0000036g0540.1
MSTRG.20363.3	Nitab4.5_0000036g0550.1
MSTRG.20376.1	Nitab4.5_0000036g0560.1
MSTRG.20376.2	Nitab4.5_0000036g0570.1
MSTRG.20377.1	Nitab4.5_0000036g0580.1
MSTRG.20380.1	Nitab4.5_0000036g0590.1
MSTRG.20385.1	Nitab4.5_0000036g0600.1
MSTRG.20388.1	Nitab4.5_0000036g0610.1
MSTRG.20389.1	Nitab4.5_0000036g0620.1
MSTRG.20390.1	Nitab4.5_0000036g0630.1
MSTRG.20391.1	Nitab4.5_0000037g0010.1
MSTRG.20414.1	Nitab4.5_0000037g0020.1
MSTRG.20416.1	Nitab4.5_0000037g0030.1
MSTRG.20458.1	Nitab4.5_0000037g0040.1
MSTRG.20463.1	Nitab4.5_0000037g0050.1
MSTRG.20466.1	Nitab4.5_0000037g0060.1
MSTRG.20469.1	Nitab4.5_0000037g0070.1
MSTRG.20470.1	Nitab4.5_0000037g0080.1
MSTRG.20470.2	Nitab4.5_0000037g0090.1
MSTRG.20470.4	Nitab4.5_0000037g0100.1
MSTRG.20471.1	Nitab4.5_0000037g0110.1
MSTRG.20484.1	Nitab4.5_0000037g0120.1
MSTRG.20505.1	Nitab4.5_0000037g0130.1
MSTRG.20507.1	Nitab4.5_0000037g0140.1
MSTRG.20507.2	Nitab4.5_0000037g0150.1
MSTRG.2051.1	Nitab4.5_0000037g0160.1
MSTRG.20519.1	Nitab4.5_0000037g0170.1
MSTRG.20520.1	Nitab4.5_0000037g0180.1
MSTRG.2055.1	Nitab4.5_0000037g0190.1
MSTRG.20563.1	Nitab4.5_0000037g0200.1
MSTRG.20563.2	Nitab4.5_0000037g0210.1
MSTRG.20563.3	Nitab4.5_0000037g0220.1
MSTRG.20568.1	Nitab4.5_0000037g0230.1
MSTRG.20573.1	Nitab4.5_0000037g0240.1
MSTRG.20574.1	Nitab4.5_0000037g0250.1
MSTRG.20575.1	Nitab4.5_0000037g0260.1
MSTRG.20587.1	Nitab4.5_0000037g0270.1
MSTRG.20594.1	Nitab4.5_0000037g0280.1
MSTRG.20598.1	Nitab4.5_0000037g0290.1
MSTRG.20600.1	Nitab4.5_0000037g0300.1
MSTRG.20604.1	Nitab4.5_0000037g0310.1
MSTRG.20620.1	Nitab4.5_0000037g0320.1
MSTRG.20628.1	Nitab4.5_0000037g0330.1
MSTRG.20629.1	Nitab4.5_0000037g0340.1
MSTRG.20635.1	Nitab4.5_0000037g0350.1
MSTRG.20635.2	Nitab4.5_0000037g0360.1
MSTRG.20635.3	Nitab4.5_0000037g0370.1
MSTRG.2064.1	Nitab4.5_0000038g0010.1
MSTRG.20640.1	Nitab4.5_0000038g0020.1
MSTRG.20666.5	Nitab4.5_0000038g0030.1
MSTRG.20668.1	Nitab4.5_0000038g0040.1
MSTRG.20673.2	Nitab4.5_0000038g0050.1
MSTRG.20675.1	Nitab4.5_0000038g0060.1
MSTRG.20675.2	Nitab4.5_0000038g0070.1
MSTRG.20678.1	Nitab4.5_0000038g0080.1
MSTRG.20681.1	Nitab4.5_0000038g0090.1
MSTRG.20688.1	Nitab4.5_0000038g0100.1
MSTRG.20689.7	Nitab4.5_0000038g0110.1
MSTRG.20697.1	Nitab4.5_0000038g0120.1
MSTRG.20698.1	Nitab4.5_0000038g0130.1
MSTRG.20699.1	Nitab4.5_0000038g0140.1
MSTRG.20700.1	Nitab4.5_0000038g0150.1
MSTRG.20701.1	Nitab4.5_0000038g0160.1
MSTRG.20708.1	Nitab4.5_0000038g0170.1
MSTRG.2072.41	Nitab4.5_0000038g0180.1
MSTRG.2072.42	Nitab4.5_0000038g0190.1
MSTRG.20725.1	Nitab4.5_0000038g0200.1
MSTRG.2073.1	Nitab4.5_0000038g0210.1
MSTRG.20731.1	Nitab4.5_0000038g0220.1
MSTRG.20743.2	Nitab4.5_0000038g0230.1
MSTRG.20754.1	Nitab4.5_0000038g0240.1
MSTRG.20754.2	Nitab4.5_0000038g0250.1
MSTRG.20782.1	Nitab4.5_0000038g0260.1
MSTRG.20793.1	Nitab4.5_0000038g0270.1
MSTRG.20797.1	Nitab4.5_0000038g0280.1
MSTRG.20803.1	Nitab4.5_0000038g0290.1
MSTRG.20809.1	Nitab4.5_0000038g0300.1
MSTRG.20811.1	Nitab4.5_0000038g0310.1
MSTRG.20815.1	Nitab4.5_0000038g0320.1
MSTRG.2082.5	Nitab4.5_0000038g0330.1
MSTRG.2083.1	Nitab4.5_0000038g0340.1
MSTRG.20832.1	Nitab4.5_0000038g0350.1
MSTRG.20841.1	Nitab4.5_0000038g0360.1
MSTRG.20849.1	Nitab4.5_0000038g0370.1
MSTRG.2087.1	Nitab4.5_0000038g0380.1
MSTRG.20875.1	Nitab4.5_0000038g0390.1
MSTRG.20881.1	Nitab4.5_0000038g0400.1
MSTRG.20883.1	Nitab4.5_0000038g0410.1
MSTRG.20886.1	Nitab4.5_0000039g0010.1
MSTRG.20886.3	Nitab4.5_0000039g0020.1
MSTRG.20888.1	Nitab4.5_0000039g0030.1
MSTRG.20889.1	Nitab4.5_0000039g0040.1
MSTRG.20890.1	Nitab4.5_0000039g0050.1
MSTRG.20890.2	Nitab4.5_0000039g0060.1
MSTRG.20891.1	Nitab4.5_0000039g0070.1
MSTRG.20906.1	Nitab4.5_0000039g0080.1
MSTRG.20910.2	Nitab4.5_0000039g0090.1
MSTRG.20922.1	Nitab4.5_0000039g0100.1
MSTRG.20930.1	Nitab4.5_0000039g0110.1
MSTRG.20930.2	Nitab4.5_0000039g0120.1
MSTRG.20931.1	Nitab4.5_0000039g0130.1
MSTRG.20938.1	Nitab4.5_0000039g0140.1
MSTRG.20938.2	Nitab4.5_0000039g0150.1
MSTRG.20939.1	Nitab4.5_0000039g0160.1
MSTRG.20945.1	Nitab4.5_0000039g0170.1
MSTRG.20946.1	Nitab4.5_0000039g0180.1
MSTRG.20950.1	Nitab4.5_0000039g0190.1
MSTRG.20953.1	Nitab4.5_0000039g0200.1
MSTRG.20964.1	Nitab4.5_0000040g0010.1
MSTRG.20968.1	Nitab4.5_0000040g0020.1
MSTRG.20979.1	Nitab4.5_0000040g0030.1
MSTRG.20981.1	Nitab4.5_0000040g0040.1
MSTRG.20982.1	Nitab4.5_0000040g0050.1
MSTRG.20989.2	Nitab4.5_0000040g0060.1
MSTRG.20989.3	Nitab4.5_0000040g0070.1
MSTRG.20989.4	Nitab4.5_0000040g0080.1
MSTRG.20992.1	Nitab4.5_0000040g0090.1
MSTRG.20994.1	Nitab4.5_0000040g0100.1
MSTRG.21.1	Nitab4.5_0000040g0110.1
MSTRG.21006.1	Nitab4.5_0000040g0120.1
MSTRG.21006.2	Nitab4.5_0000040g0130.1
MSTRG.21020.1	Nitab4.5_0000040g0140.1
MSTRG.21023.1	Nitab4.5_0000040g0150.1
MSTRG.21041.1	Nitab4.5_0000040g0160.1
MSTRG.21046.1	Nitab4.5_0000040g0170.1
MSTRG.21057.1	Nitab4.5_0000040g0180.1
MSTRG.21061.1	Nitab4.5_0000040g0190.1
MSTRG.21061.2	Nitab4.5_0000040g0200.1
MSTRG.21061.3	Nitab4.5_0000040g0210.1
MSTRG.21062.1	Nitab4.5_0000040g0220.1
MSTRG.21063.1	Nitab4.5_0000040g0230.1
MSTRG.21079.1	Nitab4.5_0000040g0240.1
MSTRG.21086.1	Nitab4.5_0000040g0250.1
MSTRG.21086.2	Nitab4.5_0000040g0260.1
MSTRG.21086.3	Nitab4.5_0000040g0270.1
MSTRG.21100.1	Nitab4.5_0000040g0280.1
MSTRG.21106.1	Nitab4.5_0000040g0290.1
[truncated: 67,502 more rows]
