# Supplementary material for: Comprehensive Analysis of Long Non-coding RNA Modulates Axillary Bud Development in Tobacco (Nicotiana tabacum L.)
Source: Front Plant Sci. 2022 Feb 14;13:809435. doi: 10.3389/fpls.2022.809435 (PMC8884251; doi:10.3389/fpls.2022.809435)
Supplement: Supplementary file 8 [file Table_4.XLSX]

## Sheet: IAA
Table S4. The expression patterns for mRNAs and co-expressed lncRNAs in 'auxin hormone signal transduction' pathway.
lncRNA ID	Annotation	Cku	3hu	12hu	24hu	Ckd	3hd	mRNA ID	Cku	3hu	12hu	24hu	Ckd	3hd
MSTRG.52498.1	AUX1	0.249648	0.082997	0.0958893	0.0971197	1.00816	1.10688	Nitab4.5_0000152g0150.1	5.24118	3.64135	3.29994	3.73238	9.73969	10.3351
MSTRG.37297.1	AUX1	2.47138	1.88031	0.893603	1.67933	6.46127	6.86355	Nitab4.5_0000928g0090.1	0.563004	0.345544	0.27872	0.359788	1.32055	1.30045
MSTRG.17770.1	AUX1	0.42235	0.25053	0.0871843	0.385253	1.23526	1.58046	Nitab4.5_0000152g0150.1	5.24118	3.64135	3.29994	3.73238	9.73969	10.3351
MSTRG.9555.1	AUX1	1.09809	0.743073	0.287702	0.576823	1.23103	1.84594	Nitab4.5_0011394g0020.1	18.4276	17.6594	3.58105	15.1719	27.0802	38.52
MSTRG.46784.1	AUX1	1.0666	0.711052	0.275744	0.555376	1.20096	1.78671	Nitab4.5_0011394g0020.1	18.4276	17.6594	3.58105	15.1719	27.0802	38.52
MSTRG.32988.1	AUX1	2.11591	0.799231	0.796584	0.49779	0.0652817	0.131451	Nitab4.5_0001642g0050.1	33.3837	18.0521	15.5704	11.1055	8.90091	8.96704
MSTRG.52498.1	PIN	0.249648	0.082997	0.0958893	0.0971197	1.00816	1.10688	Nitab4.5_0000316g0050.1	1.48155	1.92246	0.811154	1.38498	8.67563	8.1794
MSTRG.52498.1	PIN	0.249648	0.082997	0.0958893	0.0971197	1.00816	1.10688	Nitab4.5_0002801g0020.1	3.03796	3.03405	0.989185	1.58003	11.3692	14.5109
MSTRG.40350.1	PIN	0.401421	0.145165	0.028726	0.19634	3.0428	2.82927	Nitab4.5_0002801g0020.1	3.03796	3.03405	0.989185	1.58003	11.3692	14.5109
MSTRG.40350.1	PIN	0.401421	0.145165	0.028726	0.19634	3.0428	2.82927	Nitab4.5_0000316g0050.1	1.48155	1.92246	0.811154	1.38498	8.67563	8.1794
MSTRG.52498.1	PIN	0.249648	0.082997	0.0958893	0.0971197	1.00816	1.10688	Nitab4.5_0000316g0050.1	1.48155	1.92246	0.811154	1.38498	8.67563	8.1794
MSTRG.60026.1	PIN	7.60065	2.71269	3.262	2.69038	9.54257	10.6269	Nitab4.5_0000720g0030.1	7.18076	5.8773	5.13473	5.65363	8.51964	9.38371
MSTRG.56784.1	GH3	1.88545	2.0726	0.865914	1.71367	14.3597	10.5829	Nitab4.5_0005474g0010.1	1.57967	1.03862	0.257486	0.90799	4.00226	3.11801
MSTRG.61023.1	GH3	1.78028	1.08324	1.08792	0.888925	1.60385	1.55405	Nitab4.5_0000222g0010.1	2.08378	1.56918	1.11704	1.12634	1.90827	1.95641
MSTRG.60026.1	ARF	7.60065	2.71269	3.262	2.69038	9.54257	10.6269	Nitab4.5_0002104g0010.1	38.6825	30.1333	31.5266	30.9351	42.979	43.3369

## Sheet: ABA
Table S4. The expression patterns for mRNAs and co-expressed lncRNAs in 'abscisic acid signal transduction' pathway.
lncRNA ID	Annotation	Cku	3hu	12hu	24hu	Ckd	3hd	mRNA ID	Cku	3hu	12hu	24hu	Ckd	3hd
MSTRG.52498.1	pp2c	0.249648	0.082997	0.0958893	0.0971197	1.00816	1.10688	Nitab4.5_0002755g0080.1	0.873087	0.787061	0.871851	1.0296	2.81948	3.18075
MSTRG.52498.1	pp2c	0.249648	0.082997	0.0958893	0.0971197	1.00816	1.10688	Nitab4.5_0007300g0020.1	8.90549	8.50514	7.60658	8.6069	15.4342	17.059
MSTRG.58198.1	pp2c	0.176125	0.111046	0.0570757	0.059257	0.746229	1.31526	Nitab4.5_0000359g0070.1	0.835191	0.406799	0.1836	0.342272	2.5945	4.2133
MSTRG.47467.1	pp2c	0.179301	0.136428	0.0515247	0.080654	0.787344	1.37667	Nitab4.5_0000359g0070.1	0.835191	0.406799	0.1836	0.342272	2.5945	4.2133
MSTRG.17770.1	pp2c	0.42235	0.25053	0.0871843	0.385253	1.23526	1.58046	Nitab4.5_0007300g0020.1	8.90549	8.50514	7.60658	8.6069	15.4342	17.059
MSTRG.40315.1	pp2c	0.763674	0.520155	0.231689	0.403581	1.3853	1.83743	Nitab4.5_0000359g0070.1	0.835191	0.406799	0.1836	0.342272	2.5945	4.2133
MSTRG.53397.1	pp2c	0.488934	0.372701	0.142219	0.168566	0.862223	1.2524	Nitab4.5_0000359g0070.1	0.835191	0.406799	0.1836	0.342272	2.5945	4.2133
MSTRG.17770.1	pp2c	0.42235	0.25053	0.0871843	0.385253	1.23526	1.58046	Nitab4.5_0015488g0010.1	10.5395	10.4264	10.9443	12.0313	20.3075	26.2887
MSTRG.28416.1	pp2c	1.80258	1.31759	0.522129	0.628929	2.60353	4.20261	Nitab4.5_0000359g0070.1	0.835191	0.406799	0.1836	0.342272	2.5945	4.2133
MSTRG.28198.1	pp2c	0.254504	0.136418	0.047206	0.162016	1.18256	1.55858	Nitab4.5_0002018g0080.1	2.52282	2.23547	2.33757	2.08083	5.65439	6.16855
MSTRG.1182.1	pp2c	0.427654	0.185078	0.123044	0.084298	1.28408	1.66455	Nitab4.5_0000003g0270.1	33.5531	26.3492	28.0295	24.5802	71.7633	90.7909
MSTRG.58253.1	pp2c	14.2354	7.08054	11.0201	4.39442	2.65833	2.09498	Nitab4.5_0004088g0090.1	62.0493	48.3585	57.026	44.449	46.5356	43.5245

## Sheet: CK
Table S4. The expression patterns for mRNAs and co-expressed lncRNAs in 'Cytokinin signal transduction' pathway.
lncRNA ID	Annotation	Cku	3hu	12hu	24hu	Ckd	3hd	mRNA ID	Cku	3hu	12hu	24hu	Ckd	3hd
MSTRG.52498.1	CKX	0.249648	0.082997	0.0958893	0.0971197	1.00816	1.10688	Nitab4.5_0001861g0120.1	0.675713	0.764146	0.48179	0.272913	3.76696	3.98899
MSTRG.28198.1	CKX	0.254504	0.136418	0.047206	0.162016	1.18256	1.55858	Nitab4.5_0001861g0120.1	0.675713	0.764146	0.48179	0.272913	3.76696	3.98899
MSTRG.42201.1	CKX	5.41677	4.35869	2.028	3.05373	15.424	18.8143	Nitab4.5_0001861g0120.1	0.675713	0.764146	0.48179	0.272913	3.76696	3.98899
MSTRG.46234.1	CKX	0.45085	0.298514	0.0413487	0.154366	1.01069	1.45774	Nitab4.5_0000703g0150.1	1.46253	0.989114	1.12634	1.43239	4.74201	6.23942
MSTRG.53928.1	ARR	0.0631623	0.280347	2.15051	4.21432	0.0419457	0.0452253	Nitab4.5_0002965g0020.1	0.860444	3.70345	6.06487	14.893	0.714825	0.673539
MSTRG.19643.2	ARR	0	1.29411	0.783664	1.6142	0.0273223	0.0569843	Nitab4.5_0000171g0100.1	0.863923	24.9655	21.6912	39.9699	0.229582	0.18508
MSTRG.33911.1	ARR	6.12402	15.5174	48.4527	69.5402	7.07646	8.57261	Nitab4.5_0002155g0050.1	0	1.07344	25.6932	39.2585	0.0239273	0.357187
MSTRG.59128.1	ARR	0	0	0.0264437	0.122371	0.584475	0.662713	Nitab4.5_0013117g0010.1	1.51594	1.67058	1.06319	1.49056	11.7067	9.46647
MSTRG.52322.1	ARR	0.593184	1.62502	9.52483	29.8307	0.773518	2.53621	Nitab4.5_0007696g0010.1	0.562167	2.26529	37.4007	97.0171	2.77659	23.0711
MSTRG.59128.1	AHK	0	0	0.0264437	0.122371	0.584475	0.662713	Nitab4.5_0000797g0140.1	2.1981	1.89075	1.33268	2.03925	6.18969	6.72215
									8

## Sheet: GA
Table S4. The expression patterns for mRNAs and co-expressed lncRNAs in 'gibberellin signal transduction' pathway.
lncRNA ID	Annotation	Cku	3hu	12hu	24hu	Ckd	3hd	mRNA ID	Cku	3hu	12hu	24hu	Ckd	3hd
MSTRG.56740.1	GRP	3.90118	4.50948	0.606705	2.93629	22.5976	12.3594	Nitab4.5_0002950g0060.1	0.995069	0.577542	0.543759	0.240238	6.7746	4.47693
MSTRG.32988.1	GRP	2.11591	0.799231	0.796584	0.49779	0.0652817	0.131451	Nitab4.5_0000560g0200.1	33.3837	18.0521	15.5704	11.1055	8.90091	8.96704
