# Supplementary material for: Comprehensive Analysis of Long Non-coding RNA Modulates Axillary Bud Development in Tobacco (Nicotiana tabacum L.)
Source: Front Plant Sci. 2022 Feb 14;13:809435. doi: 10.3389/fpls.2022.809435 (PMC8884251; doi:10.3389/fpls.2022.809435)
Supplement: Supplementary file 9 [file Table_5.XLSX]

## Sheet: glycometabolism
Table S4. The expression patterns for mRNAs and co-expressed lncRNAs in 'glycometabolism' pathway.
lncRNA ID	Annotation	Cku	3hu	12hu	24hu	Ckd	3hd	mRNA ID	Cku	3hu	12hu	24hu	Ckd	3hd
MSTRG.32043.1	Tre6P	0.146663	2.12804	23.7739	109.914	2.34525	7.70786	Nitab4.5_0001992g0100.1	2.98434	5.144	6.1463	17.3849	3.74584	3.60279
MSTRG.32043.2	Tre6P	0.0001	4.21524	13.0657	32.2197	1.62894	4.86807	Nitab4.5_0001992g0100.1	2.98434	5.144	6.1463	17.3849	3.74584	3.60279
MSTRG.58801.1	Tre6P	0.027356	0.610077	1.65971	4.32489	0.0001	0.0001	Nitab4.5_0001992g0100.1	2.98434	5.144	6.1463	17.3849	3.74584	3.60279
MSTRG.32043.1	Tre6P	0.146663	2.12804	23.7739	109.914	2.34525	7.70786	Nitab4.5_0000368g0130.1	0.018341	2.17118	5.00386	19.3586	0.0001	0.0001
MSTRG.3763.1	G6PI	0.101379	0.134038	0.504948	0.914547	0.107095	0.093085	Nitab4.5_0003263g0040.1	0.843968	1.56687	3.45767	6.89652	0.76979	0.877401
MSTRG.19613.1	G6PI	0.0945723	0.101929	0.261373	0.386361	0.844346	1.93202	Nitab4.5_0010010g0010.1	1.17561	5.63818	4.35836	5.77143	11.3895	18.6734
