# Supplementary material for: Comprehensive Analysis of Long Non-coding RNA Modulates Axillary Bud Development in Tobacco (Nicotiana tabacum L.)
Source: Front Plant Sci. 2022 Feb 14;13:809435. doi: 10.3389/fpls.2022.809435 (PMC8884251; doi:10.3389/fpls.2022.809435)
Supplement: Supplementary file 10 [file Table_6.XLSX]

## Sheet: 3 hu vs.Cku
Transcription factors and their co-expressed LncRNAs in comparion of 3 h upper axillary bud and control
Gene id	log2(fold change)	pvalue	Target prediction method	Target gene id	Family
MSTRG.37035.7	-2.62293	0.00856108	co_expression	Nitab4.5_0006699g0010.1	GRAS
MSTRG.60456.1	-1.51388	0.0156374	co_expression	Nitab4.5_0004679g0020.1
MSTRG.5532.1	1.58776	0.0479765	co_expression	Nitab4.5_0007087g0030.1
MSTRG.60456.1	-1.51388	0.0156374	co_expression	Nitab4.5_0007567g0050.1
MSTRG.60456.1	-1.51388	0.0156374	co_expression	Nitab4.5_0005135g0010.1
MSTRG.37035.7	-2.62293	0.00856108	co_expression	Nitab4.5_0000570g0050.1	NAC
MSTRG.5532.1	1.58776	0.0479765	co_expression	Nitab4.5_0005544g0080.1
MSTRG.5532.1	1.58776	0.0479765	co_expression	Nitab4.5_0002720g0100.1
MSTRG.60445.1	4.63265	0.000963959	co_expression	Nitab4.5_0000019g0240.1
MSTRG.5532.1	1.58776	0.0479765	co_expression	Nitab4.5_0000479g0020.1
MSTRG.53278.1	4.12945	0.00328563	co_expression	Nitab4.5_0000019g0240.1
MSTRG.58242.1	4.46919	0.0330525	co_expression	Nitab4.5_0001728g0050.1	AP2
MSTRG.58303.4	2.33959	0.0068357	co_expression	Nitab4.5_0006499g0020.1
MSTRG.52310.1	-1.57259	0.0477922	co_expression	Nitab4.5_0001375g0160.1
MSTRG.52498.1	-1.58934	0.000734228	co_expression	Nitab4.5_0004682g0020.1
MSTRG.52310.1	-1.57259	0.0477922	co_expression	Nitab4.5_0003529g0010.1
MSTRG.52310.1	-1.57259	0.0477922	co_expression	Nitab4.5_0012252g0010.1
MSTRG.60287.1	-1.70369	0.0370386	co_expression	Nitab4.5_0001375g0160.1
MSTRG.37035.7	-2.62293	0.00856108	co_expression	Nitab4.5_0000050g0090.1	BHLH
MSTRG.37035.7	-2.62293	0.00856108	co_expression	Nitab4.5_0000131g0320.1
MSTRG.37035.7	-2.62293	0.00856108	co_expression	Nitab4.5_0000363g0200.1
MSTRG.37035.7	-2.62293	0.00856108	co_expression	Nitab4.5_0008592g0010.1
MSTRG.5532.1	1.58776	0.0479765	co_expression	Nitab4.5_0001536g0060.1
MSTRG.52498.1	-1.58934	0.000734228	co_expression	Nitab4.5_0000122g0010.1
MSTRG.52498.1	-1.58934	0.000734228	co_expression	Nitab4.5_0005140g0050.1
MSTRG.58969.1	-1.75383	0.000942817	co_expression	Nitab4.5_0001538g0080.1	SBP
MSTRG.37035.7	-2.62293	0.00856108	co_expression	Nitab4.5_0001549g0020.1	MADS
MSTRG.58303.4	2.33959	0.0068357	co_expression	Nitab4.5_0002761g0060.1
MSTRG.8742.1	-2.11413	0.0405934	co_expression	Nitab4.5_0003997g0020.1	TGA
MSTRG.60456.1	-1.51388	0.0156374	co_expression	Nitab4.5_0000425g0220.1
MSTRG.52498.1	-1.58934	0.000734228	co_expression	Nitab4.5_0000755g0200.1
MSTRG.53278.1	4.12945	0.00328563	co_expression	Nitab4.5_0000879g0040.1	WRKY
MSTRG.52498.1	-1.58934	0.000734228	co_expression	Nitab4.5_0003579g0010.1
MSTRG.52498.1	-1.58934	0.000734228	co_expression	Nitab4.5_0000627g0060.1

## Sheet: 12 hu vs.Cku
Transcription factors and their co-expressed LncRNAs in comparion of 12 h upper axillary bud and control
Gene id	log2(fold change)	pvalue	Target prediction method	Target gene id	Family
MSTRG.59335.1	-1.57595	0.00118435	co_expression	Nitab4.5_0000461g0080.1	GRAS
MSTRG.42201.1	-1.4174	0.040716	co_expression	Nitab4.5_0000230g0040.1
MSTRG.42163.5	9.83381	0.0151774	co_expression	Nitab4.5_0001552g0080.1	NAC
MSTRG.42163.5	9.83381	0.0151774	co_expression	Nitab4.5_0001745g0030.1
MSTRG.22427.1	2.54235	0.0367891	co_expression	Nitab4.5_0000019g0240.1
MSTRG.47467.1	-1.79986	0.0278972	co_expression	Nitab4.5_0002053g0090.1
MSTRG.58943.1	3.434	0.0391127	co_expression	Nitab4.5_0000019g0240.1
MSTRG.58198.1	-1.62647	0.0365552	co_expression	Nitab4.5_0002053g0090.1
MSTRG.17770.1	-2.27664	0.0351563	co_expression	Nitab4.5_0002717g0010.1
MSTRG.20363.3	-1.75588	0.0327637	co_expression	Nitab4.5_0001310g0040.1
MSTRG.60445.1	5.85735	0.0119116	co_expression	Nitab4.5_0000019g0240.1
MSTRG.47467.1	-1.79986	0.0278972	co_expression	Nitab4.5_0000188g0310.1
MSTRG.46234.1	-3.44705	0.000743118	co_expression	Nitab4.5_0000568g0080.1
MSTRG.2519.1	-2.22818	0.0202899	co_expression	Nitab4.5_0002717g0010.1
MSTRG.26272.2	-2.09365	0.0265989	co_expression	Nitab4.5_0002720g0100.1
MSTRG.13718.1	-2.66075	0.0130061	co_expression	Nitab4.5_0001310g0040.1
MSTRG.58943.1	3.434	0.0391127	co_expression	Nitab4.5_0000058g0310.1	AP2
MSTRG.22427.1	2.54235	0.0367891	co_expression	Nitab4.5_0000058g0310.1
MSTRG.39310.1	2.88622	0.00590367	co_expression	Nitab4.5_0003110g0130.1
MSTRG.42163.5	9.83381	0.0151774	co_expression	Nitab4.5_0000026g0190.1	bHLH
MSTRG.42163.5	9.83381	0.0151774	co_expression	Nitab4.5_0001230g0010.1
MSTRG.42163.5	9.83381	0.0151774	co_expression	Nitab4.5_0001580g0110.1
MSTRG.44243.1	3.76822	0.00392231	co_expression	Nitab4.5_0000799g0020.1
MSTRG.40350.1	-3.80505	0.0230626	co_expression	Nitab4.5_0005140g0050.1
MSTRG.32043.1	7.33975	0.0227179	co_expression	Nitab4.5_0001757g0030.1
MSTRG.47467.1	-1.79986	0.0278972	co_expression	Nitab4.5_0002135g0080.1
MSTRG.58198.1	-1.62647	0.0365552	co_expression	Nitab4.5_0002135g0080.1
MSTRG.20363.3	-1.75588	0.0327637	co_expression	Nitab4.5_0010381g0010.1
MSTRG.58969.1	-1.6625	0.00223867	co_expression	Nitab4.5_0001538g0080.1	SBP
MSTRG.44243.1	3.76822	0.00392231	co_expression	Nitab4.5_0000706g0150.1
MSTRG.17770.1	-2.27664	0.0351563	co_expression	Nitab4.5_0010273g0010.1
MSTRG.42163.5	9.83381	0.0151774	co_expression	Nitab4.5_0000036g0250.1	MADS
MSTRG.42163.5	9.83381	0.0151774	co_expression	Nitab4.5_0001797g0040.1
MSTRG.17770.1	-2.27664	0.0351563	co_expression	Nitab4.5_0005597g0030.1
MSTRG.58943.1	3.434	0.0391127	co_expression	Nitab4.5_0002041g0030.1
MSTRG.22427.1	2.54235	0.0367891	co_expression	Nitab4.5_0002041g0030.1
MSTRG.8704.1	-3.18894	0.00480257	co_expression	Nitab4.5_0005597g0030.1
MSTRG.17770.1	-2.27664	0.0351563	co_expression	Nitab4.5_0004756g0060.1	TGA
MSTRG.22427.1	2.54235	0.0367891	co_expression	Nitab4.5_0002020g0050.1
MSTRG.8704.1	-3.18894	0.00480257	co_expression	Nitab4.5_0000425g0220.1
MSTRG.28198.1	-2.43121	0.00853971	co_expression	Nitab4.5_0001232g0120.1	WRKY
MSTRG.46234.1	-3.44705	0.000743118	co_expression	Nitab4.5_0000604g0060.1
MSTRG.58943.1	3.434	0.0391127	co_expression	Nitab4.5_0006585g0010.1
MSTRG.58943.1	3.434	0.0391127	co_expression	Nitab4.5_0007163g0030.1
MSTRG.22427.1	2.54235	0.0367891	co_expression	Nitab4.5_0006585g0010.1
MSTRG.22427.1	2.54235	0.0367891	co_expression	Nitab4.5_0007163g0030.1
MSTRG.17770.1	-2.27664	0.0351563	co_expression	Nitab4.5_0003540g0070.1
MSTRG.46234.1	-3.44705	0.000743118	co_expression	Nitab4.5_0000048g0080.1
MSTRG.40350.1	-3.80505	0.0230626	co_expression	Nitab4.5_0003579g0010.1
MSTRG.52022.1	-1.10192	0.0298816	co_expression	Nitab4.5_0002362g0040.1
MSTRG.8704.1	-3.18894	0.00480257	co_expression	Nitab4.5_0005345g0020.1	GATA
MSTRG.895.1	-2.25577	0.0411653	co_expression	Nitab4.5_0005345g0020.1

## Sheet: 24 hu vs.CKu
Transcription factors and their co-expressed LncRNAs in comparion of 24 h upper axillary bud and control
Gene id	log2(fold change)	pvalue	Target prediction method	Target gene id	Family
MSTRG.14989.8	-5.39669	0.000113378	co_expression	Nitab4.5_0000129g0050.1	GRAS
MSTRG.37035.7	-1.77292	0.0245684	co_expression	Nitab4.5_0006532g0010.1
MSTRG.57901.1	-1.5478	0.00162652	co_expression	Nitab4.5_0002715g0020.1
MSTRG.57702.1	-2.30701	0.0343384	co_expression	Nitab4.5_0001971g0010.1
MSTRG.59128.1	10.257	0.0240564	co_expression	Nitab4.5_0006222g0030.1
MSTRG.57901.1	-1.5478	0.00162652	co_expression	Nitab4.5_0000084g0320.1
MSTRG.37035.7	-1.77292	0.0245684	co_expression	Nitab4.5_0000564g0050.1	NAC
MSTRG.57901.1	-1.5478	0.00162652	co_expression	Nitab4.5_0009310g0010.1
MSTRG.39186.1	3.44815	0.000139284	co_expression	Nitab4.5_0000118g0110.1
MSTRG.46234.1	-1.54662	0.00997731	co_expression	Nitab4.5_0018289g0010.1
MSTRG.58253.1	-1.69575	0.011291	co_expression	Nitab4.5_0009028g0030.1
MSTRG.57901.1	-1.5478	0.00162652	co_expression	Nitab4.5_0000695g0090.1
MSTRG.61995.1	1.70909	0.0202167	co_expression	Nitab4.5_0008691g0010.1
MSTRG.57901.1	-1.5478	0.00162652	co_expression	Nitab4.5_0000495g0180.1
MSTRG.12444.1	-1.82705	0.00497972	co_expression	Nitab4.5_0001552g0070.1
MSTRG.14989.8	-5.39669	0.000113378	co_expression	Nitab4.5_0001220g0070.1	AP2
MSTRG.14989.8	-5.39669	0.000113378	co_expression	Nitab4.5_0020510g0020.1
MSTRG.12444.1	-1.82705	0.00497972	co_expression	Nitab4.5_0002337g0030.1
MSTRG.32043.2	18.2976	0.00412638	co_expression	Nitab4.5_0001992g0100.1
MSTRG.57901.1	-1.5478	0.00162652	co_expression	Nitab4.5_0000116g0210.1
MSTRG.57901.1	-1.5478	0.00162652	co_expression	Nitab4.5_0002300g0070.1
MSTRG.57901.1	-1.5478	0.00162652	co_expression	Nitab4.5_0000092g0080.1
MSTRG.18610.1	-3.31201	0.00161752	co_expression	Nitab4.5_0000013g0510.1
MSTRG.58253.1	-1.69575	0.011291	co_expression	Nitab4.5_0001986g0020.1
MSTRG.57901.1	-1.5478	0.00162652	co_expression	Nitab4.5_0000303g0030.1
MSTRG.14989.8	-5.39669	0.000113378	co_expression	Nitab4.5_0001668g0050.1	BHLH
MSTRG.14989.8	-5.39669	0.000113378	co_expression	Nitab4.5_0002516g0060.1
MSTRG.14989.8	-5.39669	0.000113378	co_expression	Nitab4.5_0004707g0040.1
MSTRG.37035.7	-1.77292	0.0245684	co_expression	Nitab4.5_0000044g0260.1
MSTRG.37035.7	-1.77292	0.0245684	co_expression	Nitab4.5_0000103g0210.1
MSTRG.37035.7	-1.77292	0.0245684	co_expression	Nitab4.5_0000335g0260.1
MSTRG.37035.7	-1.77292	0.0245684	co_expression	Nitab4.5_0008588g0030.1
MSTRG.1182.1	-2.34321	0.0433213	co_expression	Nitab4.5_0000886g0020.1
MSTRG.57901.1	-1.5478	0.00162652	co_expression	Nitab4.5_0002450g0160.1
MSTRG.59128.1	10.257	0.0240564	co_expression	Nitab4.5_0007402g0050.1
MSTRG.30782.1	-1.52039	0.00145079	co_expression	Nitab4.5_0002370g0070.1
MSTRG.5173.1	1.81214	0.00603727	co_expression	Nitab4.5_0000510g0050.1
MSTRG.37209.1	2.61267	0.000117675	co_expression	Nitab4.5_0029410g0010.1	SBP
MSTRG.14989.8	-5.39669	0.000113378	co_expression	Nitab4.5_0002503g0030.1	MADS
MSTRG.14989.8	-5.39669	0.000113378	co_expression	Nitab4.5_0003378g0060.1
MSTRG.14989.8	-5.39669	0.000113378	co_expression	Nitab4.5_0006248g0030.1
MSTRG.37035.7	-1.77292	0.0245684	co_expression	Nitab4.5_0001503g0120.1
MSTRG.57901.1	-1.5478	0.00162652	co_expression	Nitab4.5_0011886g0020.1	TGA
MSTRG.30782.1	-1.52039	0.00145079	co_expression	Nitab4.5_0004241g0050.1	WRKY
MSTRG.58253.1	-1.69575	0.011291	co_expression	Nitab4.5_0006022g0030.1
MSTRG.49687.1	-1.73731	0.0425457	co_expression	Nitab4.5_0001968g0140.1
MSTRG.56113.1	-1.99269	0.021081	co_expression	Nitab4.5_0000787g0160.1
MSTRG.58253.1	-1.69575	0.011291	co_expression	Nitab4.5_0001986g0020.1
MSTRG.39186.1	3.44815	0.000139284	co_expression	Nitab4.5_0011087g0010.1
MSTRG.53534.1	-1.69994	0.00499502	co_expression	Nitab4.5_0007294g0010.1	TCP
MSTRG.57901.1	-1.5478	0.00162652	co_expression	Nitab4.5_0000483g0170.1

## Sheet: 3 hdvs.Ckd
Transcription factors and their co-expressed LncRNAs in comparion of 3 h lower axillary bud and control
Gene id	log2(fold change)	pvalue	Target prediction method	Target gene id	Family
MSTRG.32043.2	1.57933	0.023924	co_expression	Nitab4.5_0004745g0030.1	AP2
MSTRG.6530.2	3.36546	0.04993	co_expression	Nitab4.5_0003090g0030.1
